# Supplementary material for: Mass spectrometric analysis of accumulated TDP-43 in amyotrophic lateral sclerosis brains
Source: PubMed Central journal article supplement (PMC4793195; doi:10.1038/srep23281), 2016-03-16
Supplement: srep23281-s1.pdf [file srep23281-s1.pdf]

## **Mass spectrometric analysis of accumulated TDP-43 in amyotrophic lateral sclerosis brains**

Fuyuki Kametani<sup>1\*</sup>, Tomokazu Obi<sup>2</sup>, Takeo Shishido<sup>2</sup>, Hiroyasu Akatsu<sup>3</sup>, Shigeo Murayama<sup>4</sup>, Yuko Saito<sup>5</sup>, Mari Yoshida<sup>6</sup>, Masato Hasegawa<sup>1\*</sup>

- 1) Department of Dementia and Higher Brain Function, Tokyo Metropolitan Institute of Medical Science, Setagaya-ku, Tokyo 156-8506, Japan
- 2) National Epilepsy Center, Shizuoka Institute of Epilepsy and Neurological Disorders, Urushiyama 886, Aoi-ku, Shizuoka 420-8688, Japan
- 3) Choju Medical Institute, Fukushima Hospital, Noyorimachiazayamanaka, Toyohashi 441-8124, Japan
- 4) Department of Neuropathology (Brain Bank for Aging Research), Tokyo Metropolitan Geriatric Hospital & Institute of Gerontology, Itabashi-ku, Tokyo 173-0015, Japan
- 5) Department of Laboratory Medicine, National Center Hospital, NCNP, 4-1-1 Ogawahigashi, Kodaira, Tokyo 187-8502, Japan
- 6) Department of Neuropathology, Institute for Medical Science of Aging, Aichi Medical University, Nagakute, Aichi 480-1195, Japan

### **Keywords**

TDP-43, inclusion body, phosphorylation, fragmentation, frontotemporal lobar degeneration with ubiquitin-positive inclusions, amyotrophic lateral sclerosis, proteomics, mass spectrometry.

### **\*Corresponding author**

Fuyuki Kametani

Department of Dementia and Higher Brain Function Research  
Tokyo Metropolitan Institute of Medical Science, Tokyo 156-8506, Japan

TEL: +81-3-6834-2349, E-mail: kametani-fy@igakuken.or.jp

Masato Hasegawa

Department of Dementia and Higher Brain Function Research  
Tokyo Metropolitan Institute of Medical Science, Tokyo 156-8506, Japan

TEL: +81-3-6834-2349, E-mail: hasegawa-ms@igakuken.or.jp

## **Figure legends**

### **Supplemental Figure S1**

Identification of cleavage site peptides by LC-MS/MS analysis. Product ion spectrum of a mass signal of tryptic or chymotryptic peptides detected in gel bands from case 1 (A-E) and from case 2 (G-L), showing the b/a and y ion series. These peptides were listed in Table1 and 2. Cleavage sites were indicated by arrows in Figure 3.

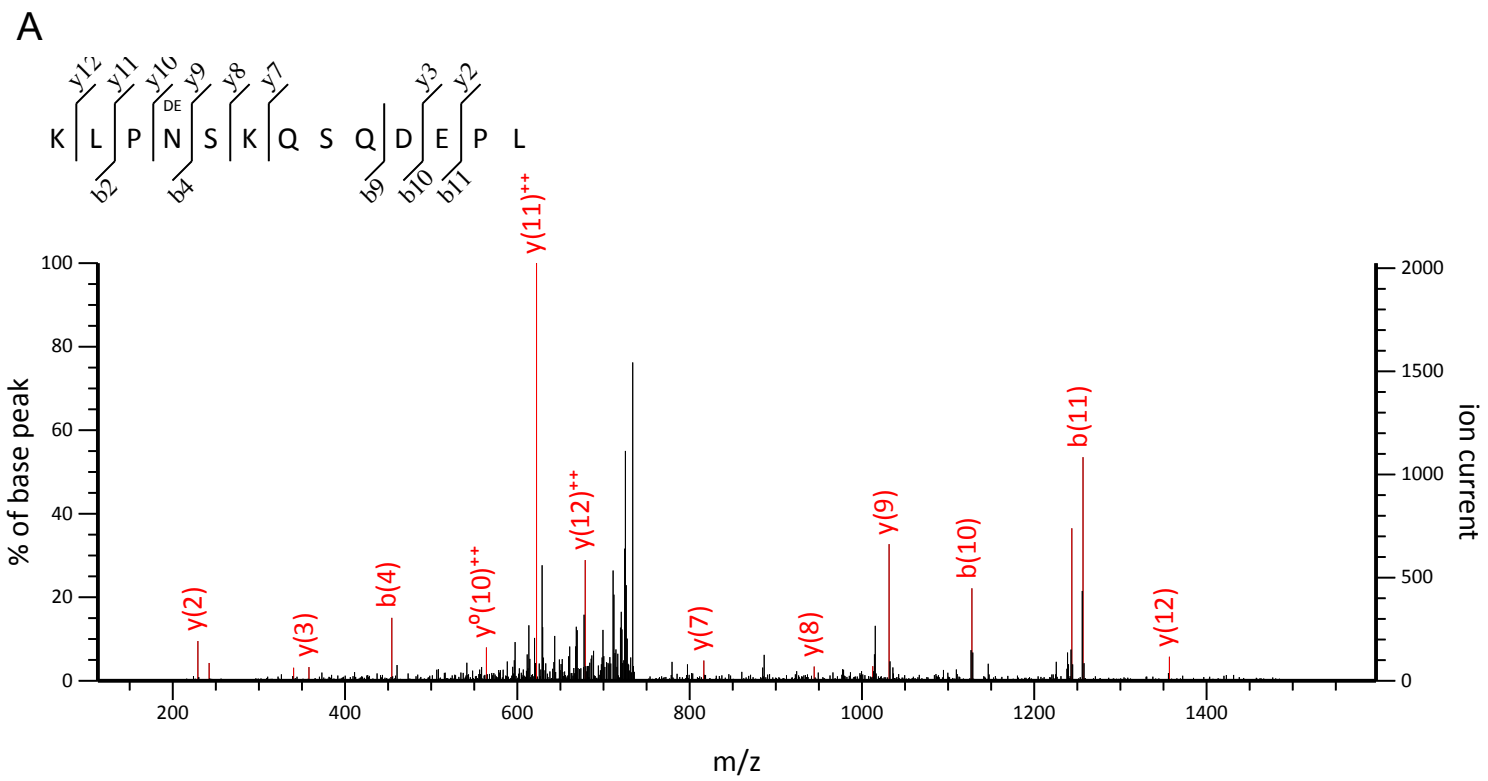

Figure S1

B

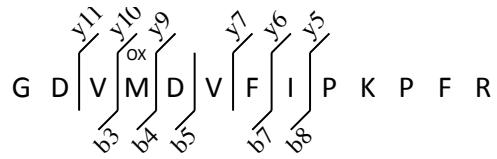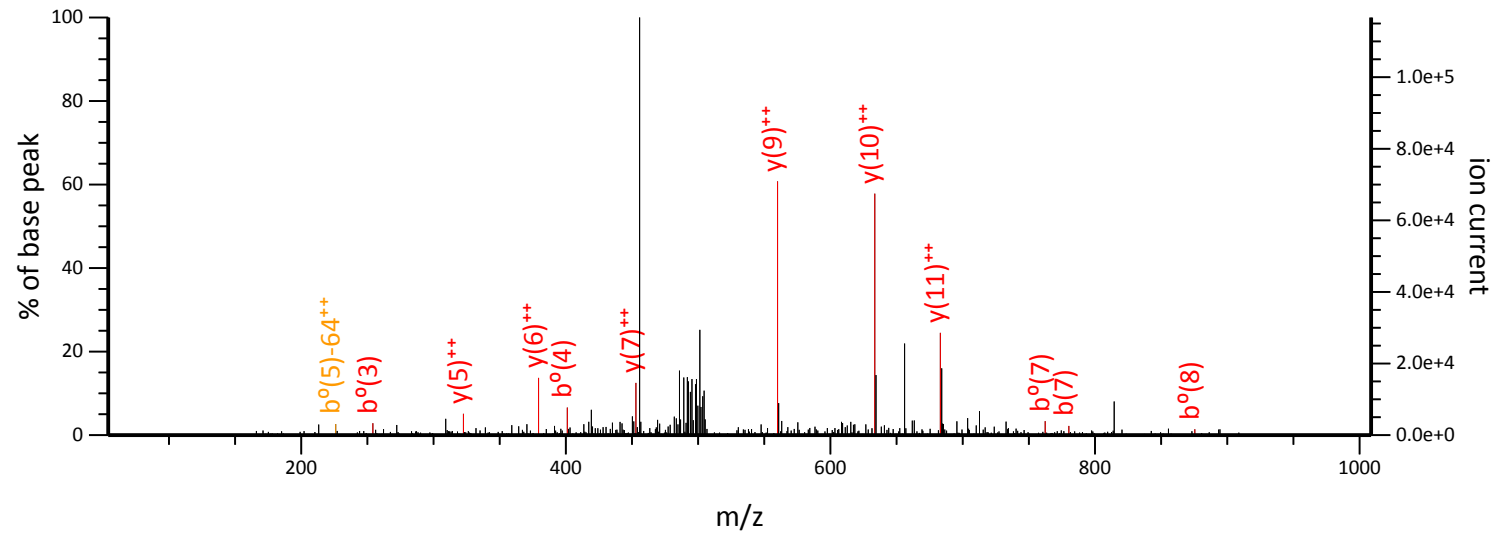

Figure S1

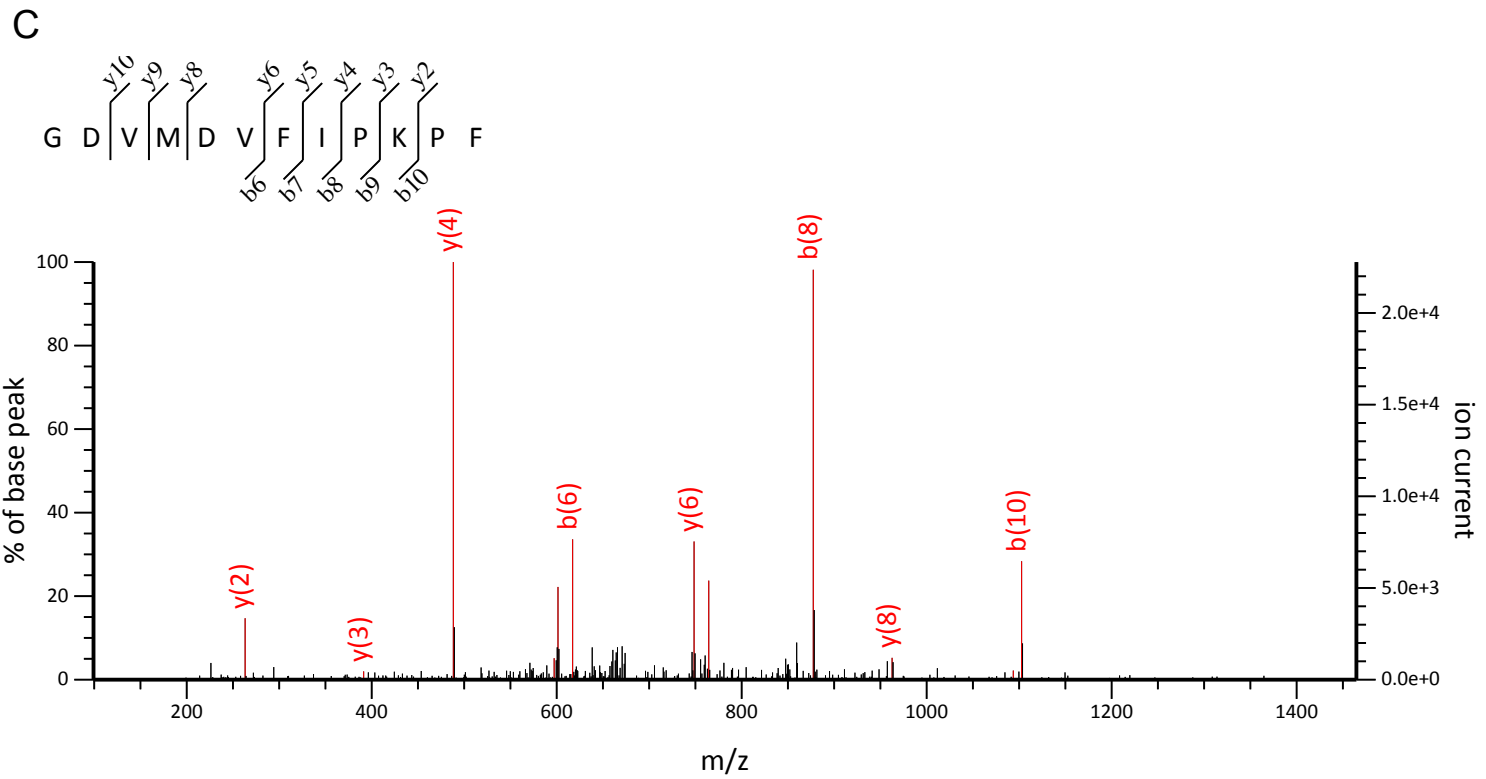

Figure S1

D

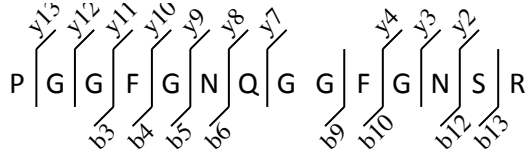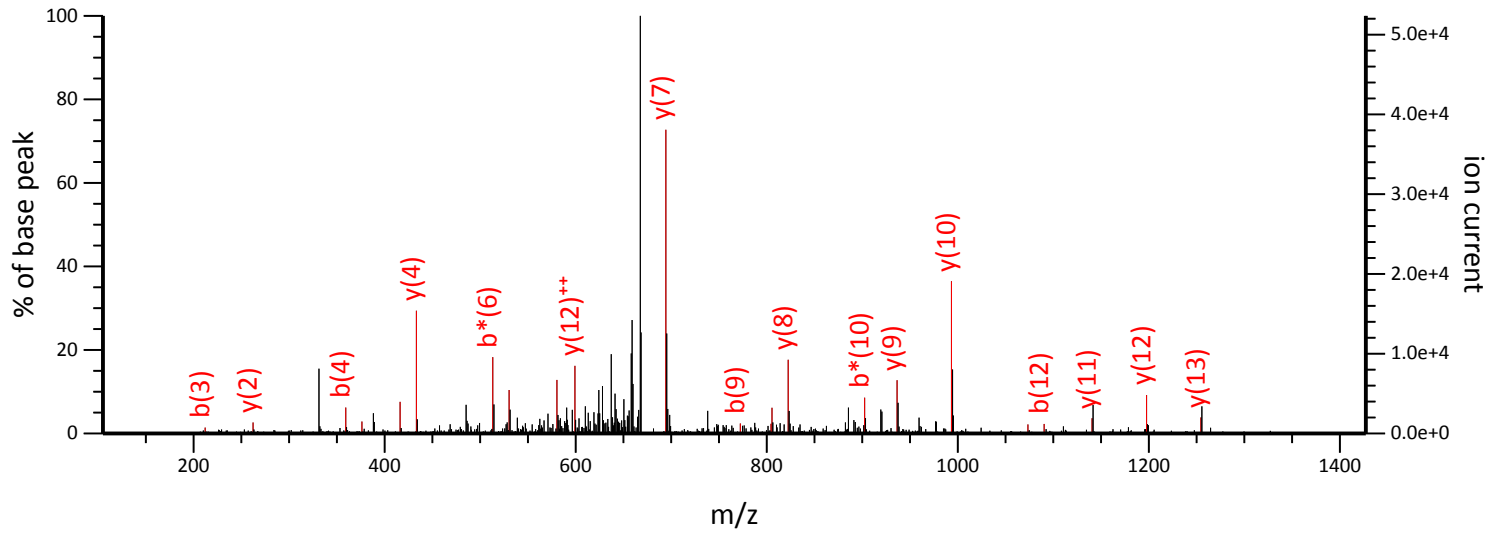

Figure S1

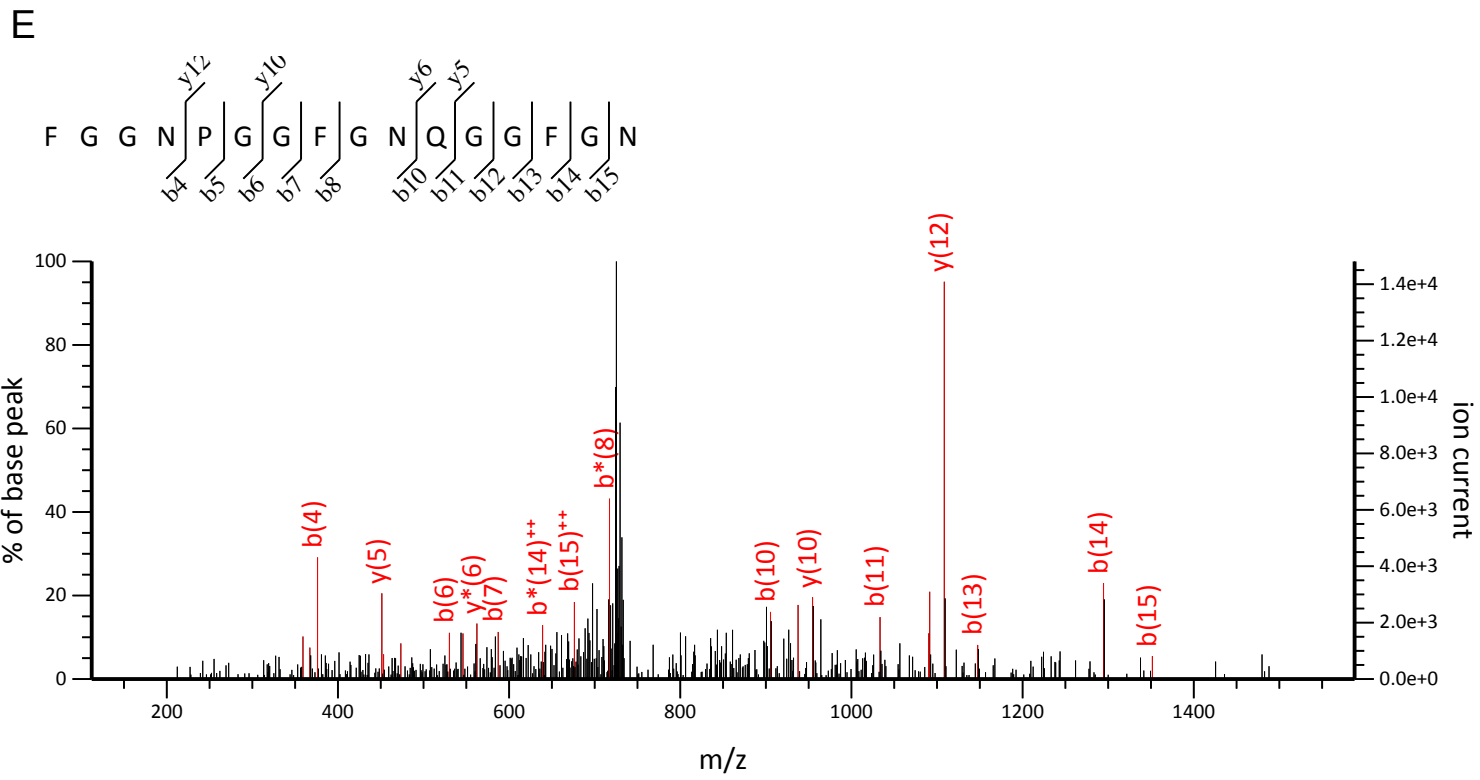

Figure S1

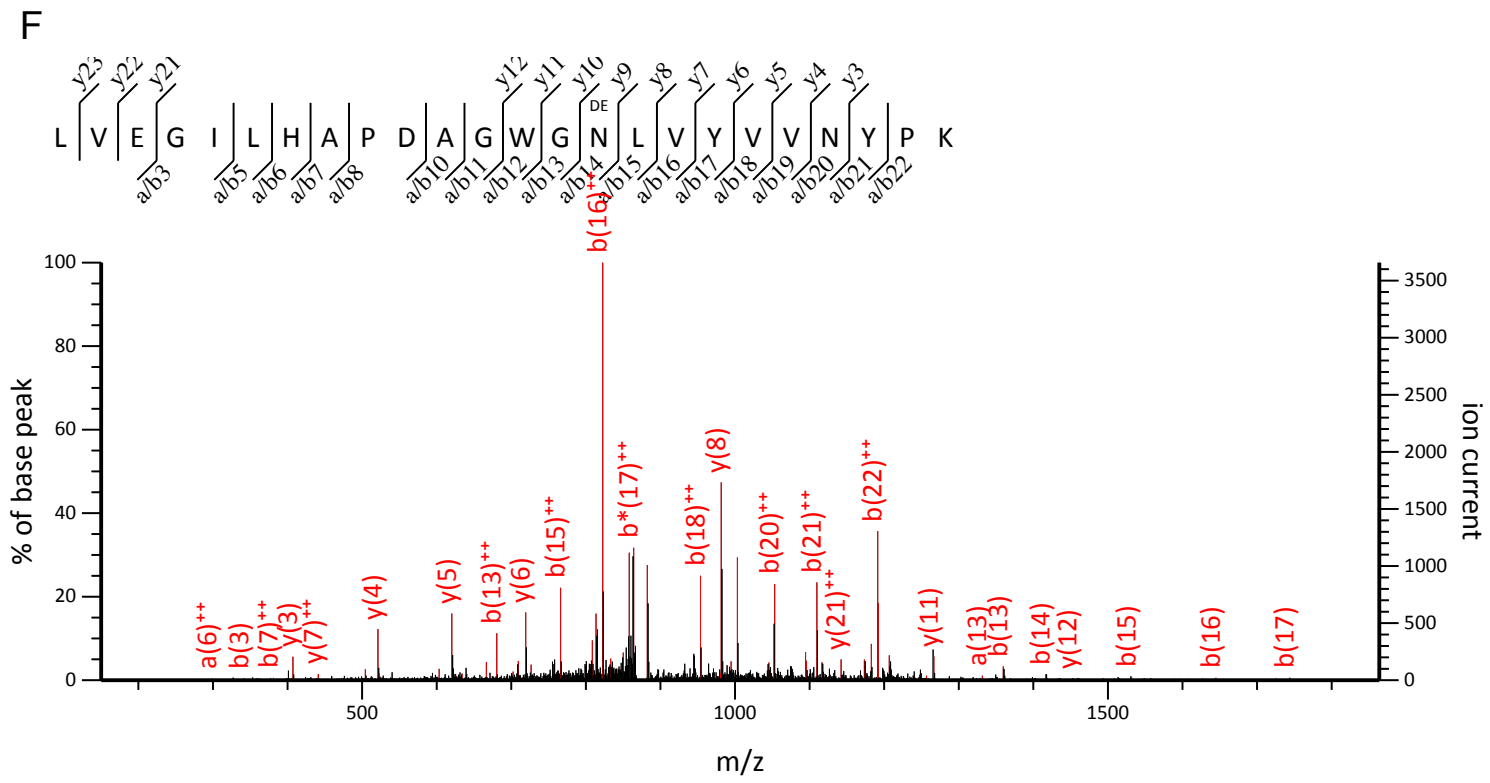

Figure S1



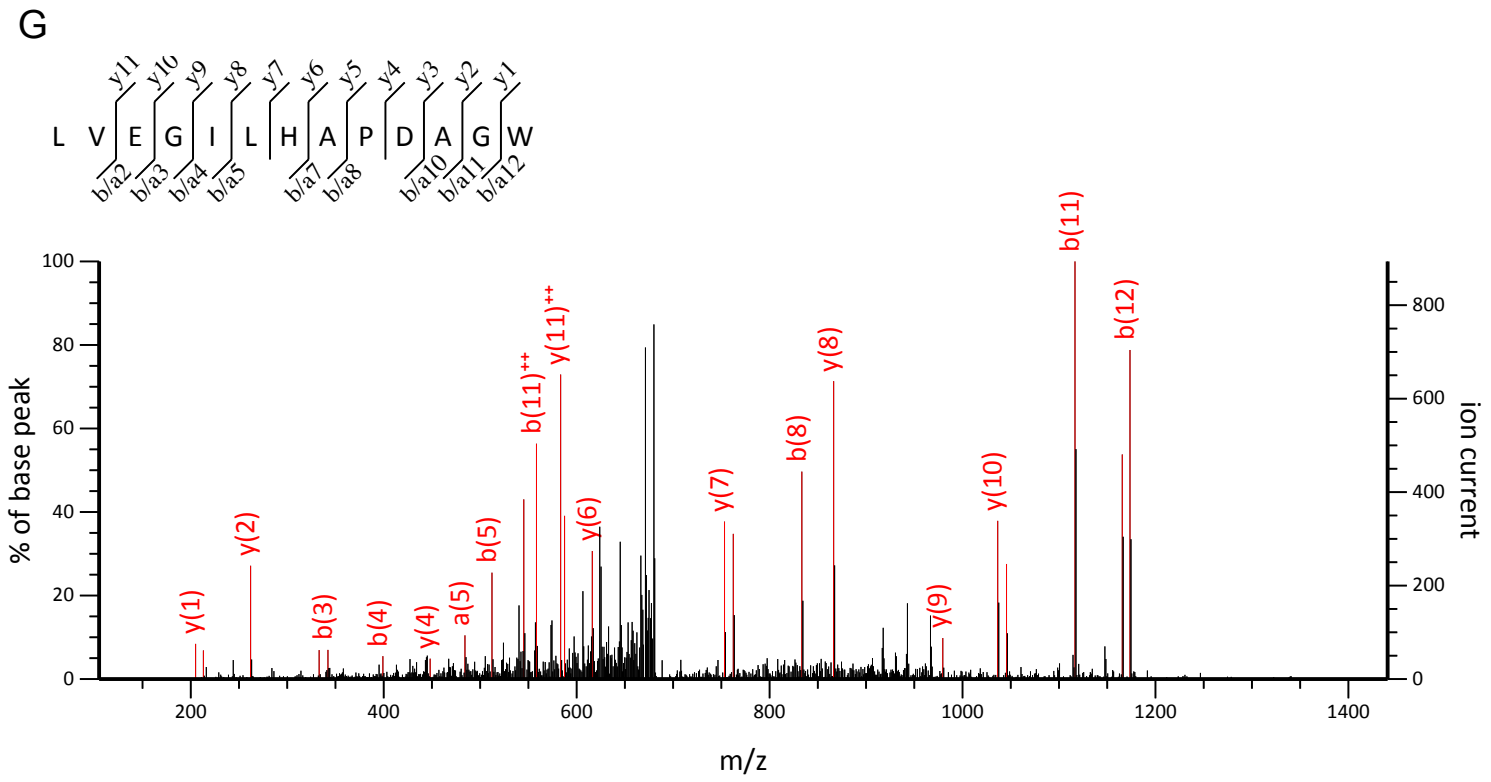

Figure S1

H

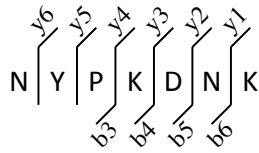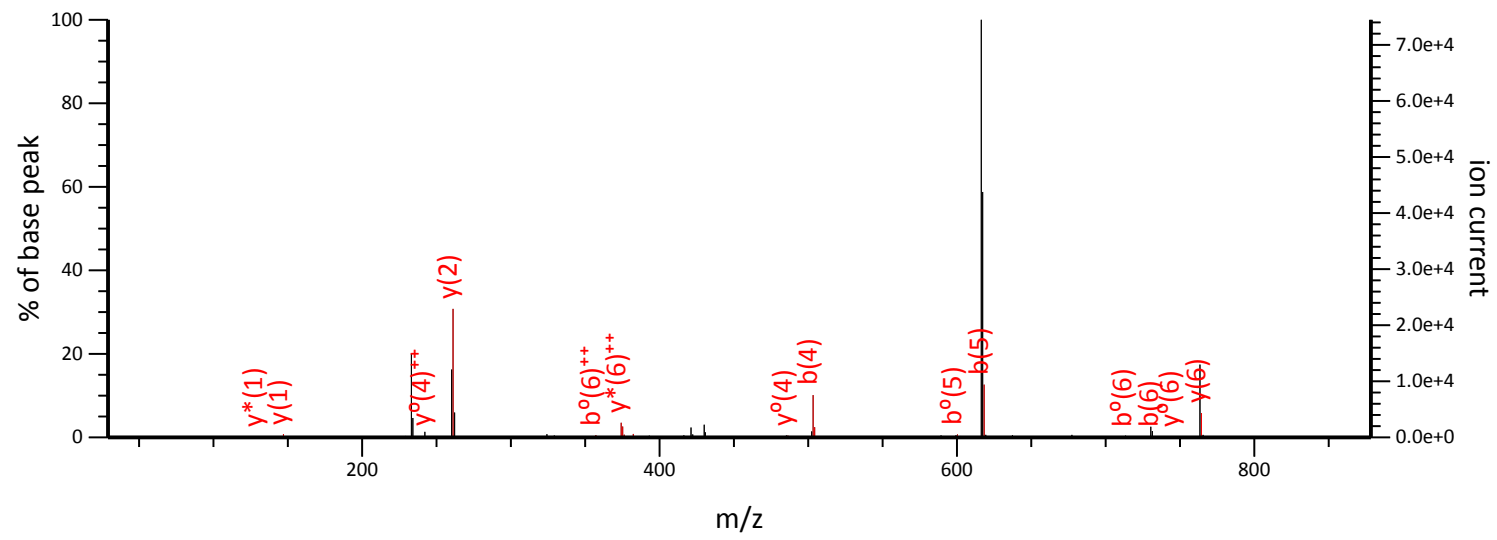

Figure S1





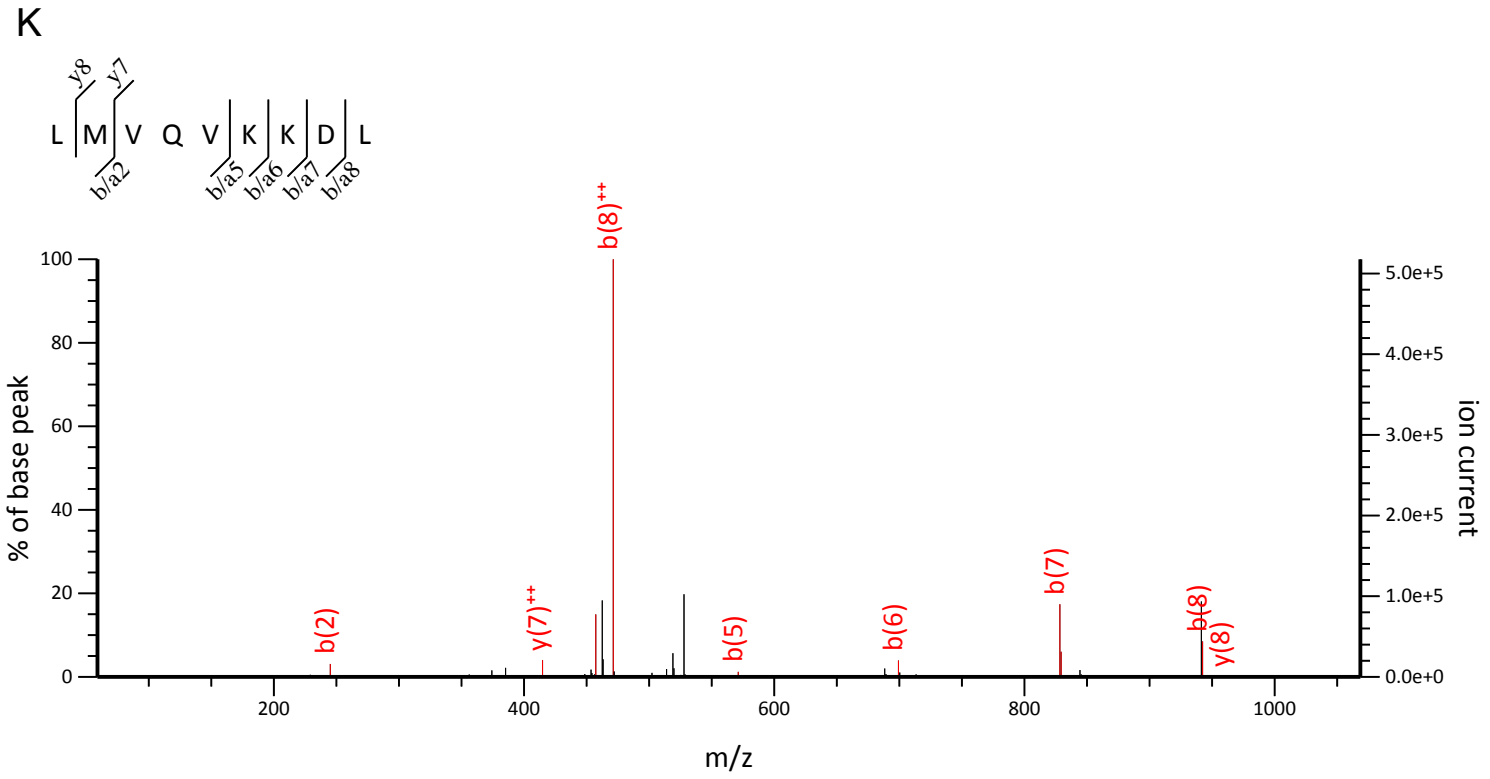

Figure S1

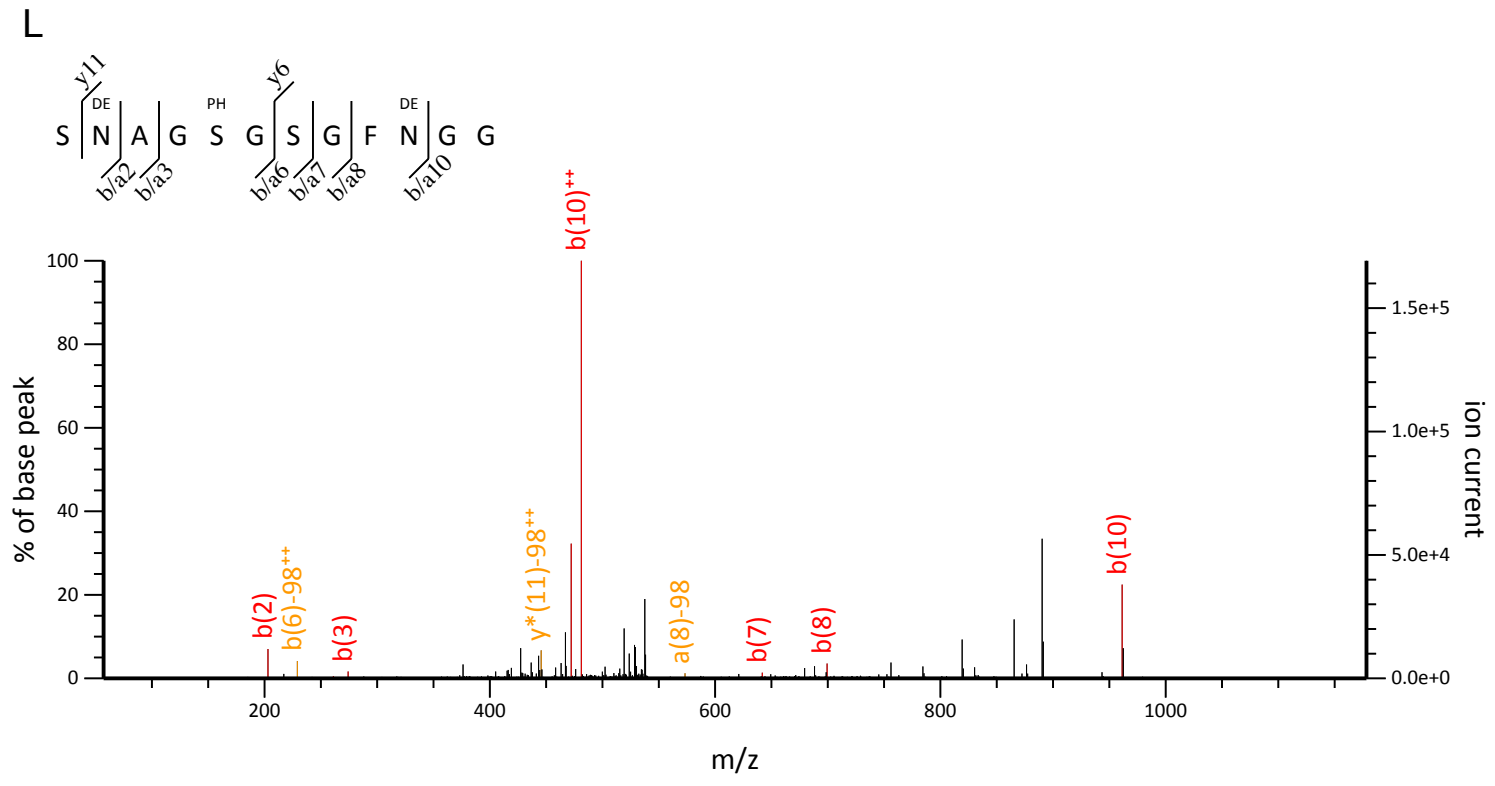

Figure S1

Supplemental Table S3. List of identified proteins in Sarkosyl-insoluble fraction.

| Biological sample category | Biological sample name | MS/MS sample name | Protein name                                                                                          | Protein accession numbers | Database sources        | Protein molecular weight (Da) | Protein identification probability | Number of unique peptides | Number of unique spectra | Number of total spectra | Percentage of total spectra | Percentage sequence coverage |
|----------------------------|------------------------|-------------------|-------------------------------------------------------------------------------------------------------|---------------------------|-------------------------|-------------------------------|------------------------------------|---------------------------|--------------------------|-------------------------|-----------------------------|------------------------------|
| Uncategorized Sample       | BioSample 1            | (F001785)         | Myelin proteolipid protein OS=Homo sapiens GN=PLP1 PE=1 SV=2                                          | MYPR_HUMAN                | SwissProt_2014.08.fasta | 30,077.70                     | 100.00%                            | 3                         | 3                        | 15                      | 0.09%                       | 11.60%                       |
| Uncategorized Sample       | BioSample 1            | (F001785)         | Glial fibrillary acidic protein OS=Homo sapiens GN=GFAP PE=1 SV=1                                     | GFAP_HUMAN                | SwissProt_2014.08.fasta | 49,881.40                     | 100.00%                            | 4                         | 4                        | 7                       | 0.04%                       | 11.60%                       |
| Uncategorized Sample       | BioSample 1            | (F001785)         | Proteasome subunit beta type-3 OS=Homo sapiens GN=PSMB3 PE=1 SV=2                                     | PSB3_HUMAN                | SwissProt_2014.08.fasta | 22,949.60                     | 99.80%                             | 2                         | 2                        | 2                       | 0.01%                       | 16.60%                       |
| Uncategorized Sample       | BioSample 1            | (F001785)         | Ferritin light chain OS=Homo sapiens GN=FTL PE=1 SV=2                                                 | FRIL_HUMAN                | SwissProt_2014.08.fasta | 20,020.60                     | 100.00%                            | 12                        | 19                       | 324                     | 1.96%                       | 48.00%                       |
| Uncategorized Sample       | BioSample 1            | (F001785)         | Prostaglandin-H2 D-isomerase OS=Homo sapiens GN=PTGDS PE=1 SV=1                                       | PTGDS_HUMAN               | SwissProt_2014.08.fasta | 21,029.10                     | 100.00%                            | 3                         | 3                        | 4                       | 0.02%                       | 21.60%                       |
| Uncategorized Sample       | BioSample 1            | (F001785)         | Tubulin alpha-1A chain OS=Homo sapiens GN=TUBA1A PE=1 SV=1                                            | TBA1A_HUMAN               | SwissProt_2014.08.fasta | 50,135.70                     | 100.00%                            | 8                         | 8                        | 12                      | 0.07%                       | 27.30%                       |
| Uncategorized Sample       | BioSample 1            | (F001785)         | Ras-related protein Rab-18 OS=Homo sapiens GN=RAB18 PE=1 SV=1                                         | RAB18_HUMAN               | SwissProt_2014.08.fasta | 22,977.50                     | 99.80%                             | 2                         | 2                        | 3                       | 0.02%                       | 11.70%                       |
| Uncategorized Sample       | BioSample 1            | (F001785)         | Apolipoprotein E OS=Homo sapiens GN=APOE PE=1 SV=1                                                    | APOE_HUMAN                | SwissProt_2014.08.fasta | 36,153.50                     | 100.00%                            | 3                         | 3                        | 3                       | 0.02%                       | 11.40%                       |
| Uncategorized Sample       | BioSample 1            | (F001785)         | Myelin basic protein OS=Homo sapiens GN=MBP PE=1 SV=3                                                 | MBP_HUMAN                 | SwissProt_2014.08.fasta | 33,117.70                     | 100.00%                            | 3                         | 3                        | 4                       | 0.02%                       | 11.20%                       |
| Uncategorized Sample       | BioSample 1            | (F001785)         | Ferritin heavy chain OS=Homo sapiens GN=FTH1 PE=1 SV=2                                                | FRIH_HUMAN                | SwissProt_2014.08.fasta | 21,226.20                     | 100.00%                            | 10                        | 11                       | 52                      | 0.32%                       | 38.30%                       |
| Uncategorized Sample       | BioSample 1            | (F001785)         | Ras-related protein Rab-2A OS=Homo sapiens GN=RAB2A PE=1 SV=1                                         | RAB2A_HUMAN               | SwissProt_2014.08.fasta | 23,546.20                     | 100.00%                            | 3                         | 3                        | 5                       | 0.03%                       | 20.30%                       |
| Uncategorized Sample       | BioSample 1            | (F001785)         | Phosphomevalonate kinase OS=Homo sapiens GN=PMVK PE=1 SV=3                                            | PMVK_HUMAN                | SwissProt_2014.08.fasta | 21,995.00                     | 99.80%                             | 2                         | 2                        | 2                       | 0.01%                       | 15.60%                       |
| Uncategorized Sample       | BioSample 1            | (F001785)         | Ras-related protein Rap-1b OS=Homo sapiens GN=RAP1B PE=1 SV=1                                         | RAP1B_HUMAN               | SwissProt_2014.08.fasta | 20,824.90                     | 100.00%                            | 4                         | 4                        | 4                       | 0.02%                       | 29.90%                       |
| Uncategorized Sample       | BioSample 1            | (F001785)         | Fibrinogen alpha chain OS=Homo sapiens GN=FGA PE=1 SV=2                                               | FIBA_HUMAN                | SwissProt_2014.08.fasta | 94,973.40                     | 99.80%                             | 2                         | 2                        | 2                       | 0.01%                       | 3.12%                        |
| Uncategorized Sample       | BioSample 1            | (F001785)         | Thy-1 membrane glycoprotein OS=Homo sapiens GN=THY1 PE=1 SV=2                                         | THY1_HUMAN                | SwissProt_2014.08.fasta | 17,935.20                     | 99.80%                             | 2                         | 2                        | 3                       | 0.02%                       | 15.50%                       |
| Uncategorized Sample       | BioSample 1            | (F001785)         | Tubulin beta-2A chain OS=Homo sapiens GN=TUBB2A PE=1 SV=1                                             | TBB2A_HUMAN               | SwissProt_2014.08.fasta | 49,907.10                     | 99.80%                             | 2                         | 2                        | 3                       | 0.02%                       | 16.60%                       |
| Uncategorized Sample       | BioSample 1            | (F001785)         | Transforming protein RhoA OS=Homo sapiens GN=RHOA PE=1 SV=1                                           | RHOA_HUMAN,RHOC_HUMAN     | SwissProt_2014.08.fasta | 21,768.40                     | 99.80%                             | 2                         | 2                        | 2                       | 0.01%                       | 13.00%                       |
| Uncategorized Sample       | BioSample 1            | (F001785)         | Alpha-synuclein OS=Homo sapiens GN=SNCA PE=1 SV=1                                                     | SYUA_HUMAN                | SwissProt_2014.08.fasta | 14,459.30                     | 99.80%                             | 2                         | 2                        | 2                       | 0.01%                       | 27.10%                       |
| Uncategorized Sample       | BioSample 1            | (F001785)         | Keratin, type II cytoskeletal 1 OS=Homo sapiens GN=KRT1 PE=1 SV=6                                     | K2C1_HUMAN                | SwissProt_2014.08.fasta | 66,040.30                     | 100.00%                            | 4                         | 4                        | 5                       | 0.03%                       | 7.14%                        |
| Uncategorized Sample       | BioSample 1            | (F001785)         | Peroxiredoxin-1 OS=Homo sapiens GN=PRDX1 PE=1 SV=1                                                    | PRDX1_HUMAN               | SwissProt_2014.08.fasta | 22,110.90                     | 99.80%                             | 2                         | 2                        | 2                       | 0.01%                       | 15.60%                       |
| Uncategorized Sample       | BioSample 1            | (F001785)         | Alpha-crystallin B chain OS=Homo sapiens GN=CRYAB PE=1 SV=2                                           | CRYAB_HUMAN               | SwissProt_2014.08.fasta | 20,159.50                     | 100.00%                            | 9                         | 9                        | 43                      | 0.26%                       | 58.90%                       |
| Uncategorized Sample       | BioSample 1            | (F001785)         | Plasmodin OS=Homo sapiens GN=PLLIP PE=1 SV=1                                                          | PLLIP_HUMAN               | SwissProt_2014.08.fasta | 19,987.20                     | 99.80%                             | 2                         | 2                        | 2                       | 0.01%                       | 21.40%                       |
| Uncategorized Sample       | BioSample 1            | (F001785)         | Protein kinase C gamma type OS=Homo sapiens GN=PRKCG PE=1 SV=3                                        | KPCG_HUMAN                | SwissProt_2014.08.fasta | 78,448.70                     | 99.80%                             | 2                         | 2                        | 2                       | 0.01%                       | 3.30%                        |
| Uncategorized Sample       | BioSample 1            | (F001785)         | Tubulin beta-4A chain OS=Homo sapiens GN=TUBB4A PE=1 SV=2                                             | TBB4A_HUMAN               | SwissProt_2014.08.fasta | 49,585.50                     | 100.00%                            | 6                         | 6                        | 7                       | 0.04%                       | 17.30%                       |
| Uncategorized Sample       | BioSample 1            | (F001785)         | Calcium/calmodulin-dependent protein kinase type II subunit alpha OS=Homo sapiens GN=CAMK2A PE=1 SV=2 | KCC2A_HUMAN               | SwissProt_2014.08.fasta | 54,088.70                     | 100.00%                            | 6                         | 7                        | 12                      | 0.07%                       | 15.10%                       |
| Uncategorized Sample       | BioSample 1            | (F001785)         | TAR DNA-binding protein 43 OS=Homo sapiens GN=TARDBP PE=1 SV=1                                        | TADBP_HUMAN               | SwissProt_2014.08.fasta | 44,739.70                     | 100.00%                            | 3                         | 4                        | 18                      | 0.11%                       | 10.10%                       |
| Uncategorized Sample       | BioSample 1            | (F001785)         | Microtubule-associated protein tau OS=Homo sapiens GN=MAPT PE=1 SV=5                                  | TAU_HUMAN                 | SwissProt_2014.08.fasta | 78,927.70                     | 100.00%                            | 2                         | 3                        | 15                      | 0.09%                       | 3.69%                        |
| Uncategorized Sample       | BioSample 1            | (F001785)         | Ras-related C3 botulinum toxin substrate 1 OS=Homo sapiens GN=RAC1 PE=1 SV=1                          | RAC1_HUMAN                | SwissProt_2014.08.fasta | 21,450.60                     | 99.90%                             | 2                         | 2                        | 3                       | 0.02%                       | 7.81%                        |
| Uncategorized Sample       | BioSample 1            | (F001785)         | Pleckstrin homology domain-containing family B member 1 OS=Homo sapiens GN=PLEKHB1 PE=1 SV=1          | PKHB1_HUMAN               | SwissProt_2014.08.fasta | 27,185.70                     | 100.00%                            | 4                         | 5                        | 5                       | 0.03%                       | 21.40%                       |
| Uncategorized Sample       | BioSample 1            | (F001785)         | Proteasome subunit beta type-1 OS=Homo sapiens GN=PSMB1 PE=1 SV=2                                     | PSB1_HUMAN                | SwissProt_2014.08.fasta | 26,490.50                     | 99.80%                             | 2                         | 2                        | 2                       | 0.01%                       | 14.10%                       |
| Uncategorized Sample       | BioSample 1            | (F001785)         | Phosphatidylethanolamine-binding protein 1 OS=Homo sapiens GN=PEBP1 PE=1 SV=3                         | PEBP1_HUMAN               | SwissProt_2014.08.fasta | 21,056.90                     | 100.00%                            | 5                         | 5                        | 6                       | 0.04%                       | 31.00%                       |
| Uncategorized Sample       | BioSample 1            | (F001786)         | Proteasome subunit beta type-1 OS=Homo sapiens GN=PSMB1 PE=1 SV=2                                     | PSB1_HUMAN                | SwissProt_2014.08.fasta | 26,490.50                     | 100.00%                            | 5                         | 6                        | 7                       | 0.04%                       | 26.10%                       |
| Uncategorized Sample       | BioSample 1            | (F001786)         | TAR DNA-binding protein 43 OS=Homo sapiens GN=TARDBP PE=1 SV=1                                        | TADBP_HUMAN               | SwissProt_2014.08.fasta | 44,739.70                     | 100.00%                            | 3                         | 3                        | 25                      | 0.16%                       | 7.97%                        |
| Uncategorized Sample       | BioSample 1            | (F001786)         | Myelin-oligodendrocyte glycoprotein OS=Homo sapiens GN=MOG PE=1 SV=2                                  | MOG_HUMAN                 | SwissProt_2014.08.fasta | 28,193.80                     | 100.00%                            | 4                         | 4                        | 4                       | 0.03%                       | 19.80%                       |
| Uncategorized Sample       | BioSample 1            | (F001786)         | Prostaglandin-H2 D-isomerase OS=Homo sapiens GN=PTGDS PE=1 SV=1                                       | PTGDS_HUMAN               | SwissProt_2014.08.fasta | 21,029.10                     | 99.80%                             | 2                         | 2                        | 3                       | 0.02%                       | 12.10%                       |
| Uncategorized Sample       | BioSample 1            | (F001786)         | Tubulin beta-4A chain OS=Homo sapiens GN=TUBB4A PE=1 SV=2                                             | TBB4A_HUMAN               | SwissProt_2014.08.fasta | 49,585.50                     | 99.80%                             | 2                         | 2                        | 2                       | 0.01%                       | 4.50%                        |
| Uncategorized Sample       | BioSample 1            | (F001786)         | Ubiquitin carboxyl-terminal hydrolase isozyme L1 OS=Homo sapiens GN=UCHL1 PE=1 SV=2                   | UCHL1_HUMAN               | SwissProt_2014.08.fasta | 24,824.30                     | 100.00%                            | 3                         | 3                        | 4                       | 0.03%                       | 18.40%                       |
| Uncategorized Sample       | BioSample 1            | (F001786)         | Proteasome subunit beta type-6 OS=Homo sapiens GN=PSMB6 PE=1 SV=4                                     | PSB6_HUMAN                | SwissProt_2014.08.fasta | 25,357.90                     | 100.00%                            | 3                         | 3                        | 8                       | 0.05%                       | 12.60%                       |
| Uncategorized Sample       | BioSample 1            | (F001786)         | Synaptosomal-associated protein 25 OS=Homo sapiens GN=SNAP25 PE=1 SV=1                                | SNP25_HUMAN               | SwissProt_2014.08.fasta | 23,315.40                     | 100.00%                            | 9                         | 9                        | 13                      | 0.08%                       | 55.80%                       |
| Uncategorized Sample       | BioSample 1            | (F001786)         | Hyaluronan and proteoglycan link protein 2 OS=Homo sapiens GN=HAPLN2 PE=1 SV=1                        | HPLN2_HUMAN               | SwissProt_2014.08.fasta | 37,775.60                     | 99.70%                             | 2                         | 2                        | 2                       | 0.01%                       | 5.29%                        |
| Uncategorized Sample       | BioSample 1            | (F001786)         | Ras-related protein Rab-5C OS=Homo sapiens GN=RAB5C PE=1 SV=2                                         | RAB5C_HUMAN               | SwissProt_2014.08.fasta | 23,482.70                     | 100.00%                            | 2                         | 2                        | 2                       | 0.01%                       | 11.10%                       |
| Uncategorized Sample       | BioSample 1            | (F001786)         | Keratin, type I cytoskeletal 9 OS=Homo sapiens GN=KRT9 PE=1 SV=3                                      | K1C9_HUMAN                | SwissProt_2014.08.fasta | 62,065.90                     | 99.90%                             | 2                         | 2                        | 2                       | 0.01%                       | 4.01%                        |
| Uncategorized Sample       | BioSample 1            | (F001786)         | Ferritin light chain OS=Homo sapiens GN=FTL PE=1 SV=2                                                 | FRIL_HUMAN                | SwissProt_2014.08.fasta | 20,020.60                     | 100.00%                            | 4                         | 5                        | 43                      | 0.27%                       | 26.30%                       |
| Uncategorized Sample       | BioSample 1            | (F001786)         | Peroxiredoxin-1 OS=Homo sapiens GN=PRDX1 PE=1 SV=1                                                    | PRDX1_HUMAN               | SwissProt_2014.08.fasta | 22,110.90                     | 100.00%                            | 5                         | 5                        | 7                       | 0.04%                       | 29.10%                       |
| Uncategorized Sample       | BioSample 1            | (F001786)         | Glial fibrillary acidic protein OS=Homo sapiens GN=GFAP PE=1 SV=1                                     | GFAP_HUMAN                | SwissProt_2014.08.fasta | 49,881.40                     | 100.00%                            | 14                        | 14                       | 18                      | 0.11%                       | 28.00%                       |
| Uncategorized Sample       | BioSample 1            | (F001786)         | Microtubule-associated protein tau OS=Homo sapiens GN=MAPT PE=1 SV=5                                  | TAU_HUMAN                 | SwissProt_2014.08.fasta | 78,927.70                     | 100.00%                            | 4                         | 5                        | 6                       | 0.04%                       | 5.01%                        |
| Uncategorized Sample       | BioSample 1            | (F001786)         | Glutathione S-transferase P OS=Homo sapiens GN=GSTP1 PE=1 SV=2                                        | GSTP1_HUMAN               | SwissProt_2014.08.fasta | 23,356.70                     | 99.80%                             | 2                         | 2                        | 2                       | 0.01%                       | 12.90%                       |
| Uncategorized Sample       | BioSample 1            | (F001786)         | Rho GDP-dissociation inhibitor 1 OS=Homo sapiens GN=ARHGDI1 PE=1 SV=3                                 | GDIR1_HUMAN               | SwissProt_2014.08.fasta | 23,207.50                     | 100.00%                            | 3                         | 3                        | 4                       | 0.03%                       | 22.50%                       |
| Uncategorized Sample       | BioSample 1            | (F001786)         | Flavin reductase (NADPH) OS=Homo sapiens GN=BLVRB PE=1 SV=3                                           | BLVRB_HUMAN               | SwissProt_2014.08.fasta | 22,118.70                     | 99.80%                             | 2                         | 2                        | 3                       | 0.02%                       | 11.70%                       |
| Uncategorized Sample       | BioSample 1            | (F001786)         | Transgelin-3 OS=Homo sapiens GN=TAGLN3 PE=1 SV=2                                                      | TAGL3_HUMAN               | SwissProt_2014.08.fasta | 22,472.90                     | 100.00%                            | 2                         | 2                        | 2                       | 0.01%                       | 11.10%                       |
| Uncategorized Sample       | BioSample 1            | (F001786)         | Ras-related protein Rab-14 OS=Homo sapiens GN=RAB14 PE=1 SV=4                                         | RAB14_HUMAN               | SwissProt_2014.08.fasta | 23,897.60                     | 100.00%                            | 5                         | 5                        | 7                       | 0.04%                       | 25.60%                       |
| Uncategorized Sample       | BioSample 1            | (F001786)         | Vesicle-trafficking protein SEC22b OS=Homo sapiens GN=SEC22B PE=1 SV=4                                | SC22B_HUMAN               | SwissProt_2014.08.fasta | 24,594.00                     | 99.90%                             | 2                         | 2                        | 2                       | 0.01%                       | 10.20%                       |
| Uncategorized Sample       | BioSample 1            | (F001786)         | Neurofilament light polypeptide OS=Homo sapiens GN=NFL PE=1 SV=3                                      | NFL_HUMAN                 | SwissProt_2014.08.fasta | 61,517.80                     | 100.00%                            | 3                         | 3                        | 3                       | 0.02%                       | 8.84%                        |
| Uncategorized Sample       | BioSample 1            | (F001786)         | Ras-related protein Rab-10 OS=Homo sapiens GN=RAB10 PE=1 SV=1                                         | RAB10_HUMAN               | SwissProt_2014.08.fasta | 22,542.10                     | 99.90%                             | 2                         | 2                        | 3                       | 0.02%                       | 17.00%                       |

|                      |             |           |                                                                                                       |                          |                         |            |         |    |    |    |       |        |
|----------------------|-------------|-----------|-------------------------------------------------------------------------------------------------------|--------------------------|-------------------------|------------|---------|----|----|----|-------|--------|
| Uncategorized Sample | BioSample 1 | (F001786) | Triosephosphate isomerase OS=Homo sapiens GN=TP11 PE=1 SV=3                                           | TPIS_HUMAN               | SwissProt_2014.08.fasta | 30,790.80  | 99.90%  | 2  | 2  | 2  | 0.01% | 8.74%  |
| Uncategorized Sample | BioSample 1 | (F001786) | Tubulin alpha-1A chain OS=Homo sapiens GN=TUBA1A PE=1 SV=1                                            | TBA1A_HUMAN              | SwissProt_2014.08.fasta | 50,135.70  | 100.00% | 4  | 4  | 4  | 0.03% | 10.40% |
| Uncategorized Sample | BioSample 1 | (F001786) | Peroxioredoxin-2 OS=Homo sapiens GN=PRDX2 PE=1 SV=5                                                   | PRDX2_HUMAN              | SwissProt_2014.08.fasta | 21,892.40  | 100.00% | 7  | 7  | 7  | 0.04% | 28.30% |
| Uncategorized Sample | BioSample 1 | (F001786) | Heme-binding protein 1 OS=Homo sapiens GN=HEBP1 PE=1 SV=1                                             | HEBP1_HUMAN              | SwissProt_2014.08.fasta | 21,097.40  | 99.90%  | 2  | 2  | 2  | 0.01% | 13.20% |
| Uncategorized Sample | BioSample 1 | (F001786) | Adenylate kinase isoenzyme 1 OS=Homo sapiens GN=AK1 PE=1 SV=3                                         | KAD1_HUMAN               | SwissProt_2014.08.fasta | 21,635.20  | 100.00% | 3  | 3  | 3  | 0.02% | 17.50% |
| Uncategorized Sample | BioSample 1 | (F001786) | Keratin, type I cytoskeletal 10 OS=Homo sapiens GN=KRT10 PE=1 SV=6                                    | K1C10_HUMAN              | SwissProt_2014.08.fasta | 58,828.80  | 100.00% | 3  | 3  | 4  | 0.03% | 5.99%  |
| Uncategorized Sample | BioSample 1 | (F001786) | Actin, cytoplasmic 1 OS=Homo sapiens GN=ACTB PE=1 SV=1                                                | ACTB_HUMAN,ACTG_HUMAN    | SwissProt_2014.08.fasta | 41,737.80  | 100.00% | 3  | 3  | 4  | 0.03% | 9.87%  |
| Uncategorized Sample | BioSample 1 | (F001786) | Thy-1 membrane glycoprotein OS=Homo sapiens GN=THY1 PE=1 SV=2                                         | THY1_HUMAN               | SwissProt_2014.08.fasta | 17,935.20  | 99.80%  | 2  | 2  | 2  | 0.01% | 15.50% |
| Uncategorized Sample | BioSample 1 | (F001786) | Fibrinogen alpha chain OS=Homo sapiens GN=FGA PE=1 SV=2                                               | FIBA_HUMAN               | SwissProt_2014.08.fasta | 94,973.40  | 100.00% | 4  | 4  | 4  | 0.03% | 4.27%  |
| Uncategorized Sample | BioSample 1 | (F001786) | Proteasome subunit beta type-4 OS=Homo sapiens GN=PSMB4 PE=1 SV=4                                     | PSB4_HUMAN               | SwissProt_2014.08.fasta | 29,205.00  | 100.00% | 4  | 4  | 5  | 0.03% | 18.90% |
| Uncategorized Sample | BioSample 1 | (F001786) | Proteasome subunit beta type-2 OS=Homo sapiens GN=PSMB2 PE=1 SV=1                                     | PSB2_HUMAN               | SwissProt_2014.08.fasta | 22,837.50  | 100.00% | 3  | 3  | 5  | 0.03% | 20.90% |
| Uncategorized Sample | BioSample 1 | (F001786) | 14-3-3 protein gamma OS=Homo sapiens GN=YWHAG PE=1 SV=2                                               | 1433G_HUMAN              | SwissProt_2014.08.fasta | 28,303.10  | 100.00% | 4  | 4  | 4  | 0.03% | 13.80% |
| Uncategorized Sample | BioSample 1 | (F001786) | Ras-related protein Rab-6A OS=Homo sapiens GN=RAB6A PE=1 SV=3                                         | RAB6A_HUMAN              | SwissProt_2014.08.fasta | 23,593.30  | 100.00% | 3  | 3  | 5  | 0.03% | 23.10% |
| Uncategorized Sample | BioSample 1 | (F001786) | Myelin basic protein OS=Homo sapiens GN=MBP PE=1 SV=3                                                 | MBP_HUMAN                | SwissProt_2014.08.fasta | 33,117.70  | 100.00% | 4  | 4  | 4  | 0.03% | 14.50% |
| Uncategorized Sample | BioSample 1 | (F001786) | Proteasome subunit alpha type-6 OS=Homo sapiens GN=PSMA6 PE=1 SV=1                                    | PSA6_HUMAN               | SwissProt_2014.08.fasta | 27,399.50  | 99.80%  | 2  | 2  | 2  | 0.01% | 8.94%  |
| Uncategorized Sample | BioSample 1 | (F001786) | Proteasome subunit alpha type-2 OS=Homo sapiens GN=PSMA2 PE=1 SV=2                                    | PSA2_HUMAN               | SwissProt_2014.08.fasta | 25,898.90  | 100.00% | 5  | 5  | 5  | 0.03% | 36.80% |
| Uncategorized Sample | BioSample 1 | (F001786) | Superoxide dismutase [Mn], mitochondrial OS=Homo sapiens GN=SOD2 PE=1 SV=2                            | SODM_HUMAN               | SwissProt_2014.08.fasta | 24,722.60  | 100.00% | 3  | 3  | 3  | 0.02% | 17.10% |
| Uncategorized Sample | BioSample 1 | (F001786) | ATP synthase subunit O, mitochondrial OS=Homo sapiens GN=ATP5O PE=1 SV=1                              | ATPO_HUMAN               | SwissProt_2014.08.fasta | 23,277.40  | 100.00% | 3  | 3  | 3  | 0.02% | 16.90% |
| Uncategorized Sample | BioSample 1 | (F001786) | Cell cycle exit and neuronal differentiation protein 1 OS=Homo sapiens GN=CEND1 PE=2 SV=1             | CEND_HUMAN               | SwissProt_2014.08.fasta | 14,954.10  | 99.90%  | 2  | 2  | 2  | 0.01% | 22.10% |
| Uncategorized Sample | BioSample 1 | (F001786) | Proteasome subunit beta type-5 OS=Homo sapiens GN=PSMB5 PE=1 SV=3                                     | PSB5_HUMAN               | SwissProt_2014.08.fasta | 28,481.00  | 100.00% | 8  | 9  | 12 | 0.08% | 37.30% |
| Uncategorized Sample | BioSample 1 | (F001786) | Proteasome subunit beta type-3 OS=Homo sapiens GN=PSMB3 PE=1 SV=2                                     | PSB3_HUMAN               | SwissProt_2014.08.fasta | 22,949.60  | 100.00% | 3  | 4  | 5  | 0.03% | 23.40% |
| Uncategorized Sample | BioSample 1 | (F001786) | Myelin proteolipid protein OS=Homo sapiens GN=PLP1 PE=1 SV=2                                          | MYPR_HUMAN               | SwissProt_2014.08.fasta | 30,077.70  | 100.00% | 3  | 3  | 16 | 0.10% | 11.60% |
| Uncategorized Sample | BioSample 1 | (F001786) | Apolipoprotein E OS=Homo sapiens GN=APOE PE=1 SV=1                                                    | APOE_HUMAN               | SwissProt_2014.08.fasta | 36,153.50  | 100.00% | 4  | 4  | 4  | 0.03% | 13.90% |
| Uncategorized Sample | BioSample 1 | (F001786) | Ubiquitin-60S ribosomal protein L40 OS=Homo sapiens GN=UBA52 PE=1 SV=2                                | RL40_HUMAN,RS27A_HUMAN,U | SwissProt_2014.08.fasta | 14,728.90  | 99.90%  | 2  | 2  | 2  | 0.01% | 22.70% |
| Uncategorized Sample | BioSample 1 | (F001786) | Neurofilament medium polypeptide OS=Homo sapiens GN=NEFM PE=1 SV=3                                    | NFM_HUMAN                | SwissProt_2014.08.fasta | 102,471.30 | 100.00% | 3  | 3  | 3  | 0.02% | 3.93%  |
| Uncategorized Sample | BioSample 1 | (F001786) | Calcium/calmodulin-dependent protein kinase type II subunit alpha OS=Homo sapiens GN=CAMK2A PE=1 SV=2 | KCC2A_HUMAN              | SwissProt_2014.08.fasta | 54,088.70  | 100.00% | 11 | 11 | 24 | 0.15% | 25.90% |
| Uncategorized Sample | BioSample 1 | (F001786) | Keratin, type II cytoskeletal 1 OS=Homo sapiens GN=KRT1 PE=1 SV=6                                     | K2C1_HUMAN               | SwissProt_2014.08.fasta | 66,040.30  | 100.00% | 5  | 5  | 5  | 0.03% | 11.30% |
| Uncategorized Sample | BioSample 1 | (F001786) | Ferritin heavy chain OS=Homo sapiens GN=FTH1 PE=1 SV=2                                                | FRH1_HUMAN               | SwissProt_2014.08.fasta | 21,226.20  | 100.00% | 5  | 5  | 5  | 0.03% | 25.10% |
| Uncategorized Sample | BioSample 1 | (F001788) | Ubiquitin thioesterase OTUB1 OS=Homo sapiens GN=OTUB1 PE=1 SV=2                                       | OTUB1_HUMAN              | SwissProt_2014.08.fasta | 31,284.60  | 100.00% | 2  | 2  | 2  | 0.01% | 9.96%  |
| Uncategorized Sample | BioSample 1 | (F001788) | TAR DNA-binding protein 43 OS=Homo sapiens GN=TARDBP PE=1 SV=1                                        | TADBP_HUMAN              | SwissProt_2014.08.fasta | 44,739.70  | 100.00% | 3  | 4  | 8  | 0.05% | 9.42%  |
| Uncategorized Sample | BioSample 1 | (F001788) | Alpha-intermexin OS=Homo sapiens GN=INA PE=1 SV=2                                                     | AINX_HUMAN               | SwissProt_2014.08.fasta | 55,392.30  | 100.00% | 5  | 5  | 6  | 0.04% | 13.20% |
| Uncategorized Sample | BioSample 1 | (F001788) | Glyoxylate reductase/hydroxypyruvate reductase OS=Homo sapiens GN=GRHPR PE=1 SV=1                     | GRHPR_HUMAN              | SwissProt_2014.08.fasta | 35,669.10  | 100.00% | 2  | 2  | 2  | 0.01% | 10.40% |
| Uncategorized Sample | BioSample 1 | (F001788) | Protein FAM49B OS=Homo sapiens GN=FAM49B PE=1 SV=1                                                    | FA49B_HUMAN              | SwissProt_2014.08.fasta | 36,748.70  | 100.00% | 2  | 2  | 2  | 0.01% | 8.02%  |
| Uncategorized Sample | BioSample 1 | (F001788) | Glyceraldehyde-3-phosphate dehydrogenase OS=Homo sapiens GN=GAPDH PE=1 SV=3                           | G3P_HUMAN                | SwissProt_2014.08.fasta | 36,053.40  | 99.90%  | 2  | 2  | 2  | 0.01% | 11.30% |
| Uncategorized Sample | BioSample 1 | (F001788) | Tubulin beta-4A chain OS=Homo sapiens GN=TUBB4A PE=1 SV=2                                             | TBB4A_HUMAN              | SwissProt_2014.08.fasta | 49,585.50  | 100.00% | 18 | 22 | 48 | 0.28% | 46.20% |
| Uncategorized Sample | BioSample 1 | (F001788) | Alpha-soluble NSF attachment protein OS=Homo sapiens GN=NAPA PE=1 SV=3                                | SNAA_HUMAN               | SwissProt_2014.08.fasta | 33,234.10  | 99.90%  | 2  | 2  | 2  | 0.01% | 21.00% |
| Uncategorized Sample | BioSample 1 | (F001788) | Guanine nucleotide-binding protein G(o) subunit alpha OS=Homo sapiens GN=GNAO1 PE=1 SV=4              | GNAO_HUMAN               | SwissProt_2014.08.fasta | 40,052.00  | 100.00% | 4  | 4  | 7  | 0.04% | 13.60% |
| Uncategorized Sample | BioSample 1 | (F001788) | Histone H1.3 OS=Homo sapiens GN=HIST1H1D PE=1 SV=2                                                    | H13_HUMAN                | SwissProt_2014.08.fasta | 22,351.30  | 100.00% | 4  | 4  | 20 | 0.12% | 15.40% |
| Uncategorized Sample | BioSample 1 | (F001788) | Malate dehydrogenase, cytoplasmic OS=Homo sapiens GN=MDH1 PE=1 SV=4                                   | MDHC_HUMAN               | SwissProt_2014.08.fasta | 36,426.90  | 100.00% | 7  | 7  | 12 | 0.07% | 28.40% |
| Uncategorized Sample | BioSample 1 | (F001788) | Calcium/calmodulin-dependent protein kinase type II subunit delta OS=Homo sapiens GN=CAMK2D PE=1 SV=3 | KCC2D_HUMAN              | SwissProt_2014.08.fasta | 56,370.70  | 100.00% | 3  | 3  | 5  | 0.03% | 15.20% |
| Uncategorized Sample | BioSample 1 | (F001788) | Calcium/calmodulin-dependent protein kinase type II subunit beta OS=Homo sapiens GN=CAMK2B PE=1 SV=3  | KCC2B_HUMAN              | SwissProt_2014.08.fasta | 72,678.70  | 100.00% | 5  | 5  | 9  | 0.05% | 17.60% |
| Uncategorized Sample | BioSample 1 | (F001788) | Guanine nucleotide-binding protein G(i)/G(s)/G(t) subunit beta-1 OS=Homo sapiens GN=GNB1 PE=1 SV=3    | GBB1_HUMAN               | SwissProt_2014.08.fasta | 37,377.50  | 100.00% | 2  | 2  | 6  | 0.04% | 6.18%  |
| Uncategorized Sample | BioSample 1 | (F001788) | V-type proton ATPase subunit D OS=Homo sapiens GN=ATP6V1D PE=1 SV=1                                   | VATD_HUMAN               | SwissProt_2014.08.fasta | 28,264.30  | 99.80%  | 2  | 2  | 2  | 0.01% | 11.30% |
| Uncategorized Sample | BioSample 1 | (F001788) | Voltage-dependent anion-selective channel protein 2 OS=Homo sapiens GN=VDAC2 PE=1 SV=2                | VDAG2_HUMAN              | SwissProt_2014.08.fasta | 31,567.30  | 100.00% | 2  | 2  | 2  | 0.01% | 11.20% |
| Uncategorized Sample | BioSample 1 | (F001788) | Heterogeneous nuclear ribonucleoprotein A3 OS=Homo sapiens GN=HNRNPA3 PE=1 SV=2                       | ROA3_HUMAN               | SwissProt_2014.08.fasta | 39,595.10  | 99.80%  | 2  | 2  | 3  | 0.02% | 7.14%  |
| Uncategorized Sample | BioSample 1 | (F001788) | Heterogeneous nuclear ribonucleoprotein A1 OS=Homo sapiens GN=HNRNPA1 PE=1 SV=5                       | ROA1_HUMAN               | SwissProt_2014.08.fasta | 38,747.00  | 100.00% | 6  | 6  | 10 | 0.06% | 23.70% |
| Uncategorized Sample | BioSample 1 | (F001788) | Complement C4-A OS=Homo sapiens GN=C4A PE=1 SV=2                                                      | CO4A_HUMAN               | SwissProt_2014.08.fasta | 192,786.80 | 100.00% | 4  | 4  | 4  | 0.02% | 4.30%  |
| Uncategorized Sample | BioSample 1 | (F001788) | Tubulin beta-2A chain OS=Homo sapiens GN=TUBB2A PE=1 SV=1                                             | TBB2A_HUMAN              | SwissProt_2014.08.fasta | 49,907.10  | 100.00% | 5  | 5  | 9  | 0.05% | 41.30% |
| Uncategorized Sample | BioSample 1 | (F001788) | Hyaluronan and proteoglycan link protein 2 OS=Homo sapiens GN=HAPLN2 PE=1 SV=1                        | HPLN2_HUMAN              | SwissProt_2014.08.fasta | 37,775.60  | 100.00% | 3  | 3  | 6  | 0.04% | 7.94%  |
| Uncategorized Sample | BioSample 1 | (F001788) | Syntaxin-1B OS=Homo sapiens GN=STX1B PE=1 SV=1                                                        | STX1B_HUMAN              | SwissProt_2014.08.fasta | 33,245.10  | 100.00% | 6  | 7  | 12 | 0.07% | 23.60% |
| Uncategorized Sample | BioSample 1 | (F001788) | Tubulin beta-4B chain OS=Homo sapiens GN=TUBB4B PE=1 SV=1                                             | TBB4B_HUMAN              | SwissProt_2014.08.fasta | 49,830.70  | 100.00% | 6  | 6  | 17 | 0.10% | 41.30% |
| Uncategorized Sample | BioSample 1 | (F001788) | Ferritin light chain OS=Homo sapiens GN=FTL PE=1 SV=2                                                 | FRIL_HUMAN               | SwissProt_2014.08.fasta | 20,020.60  | 99.90%  | 2  | 2  | 3  | 0.02% | 17.10% |
| Uncategorized Sample | BioSample 1 | (F001788) | 2',3'-cyclic-nucleotide 3'-phosphodiesterase OS=Homo sapiens GN=CNP PE=1 SV=2                         | CN37_HUMAN               | SwissProt_2014.08.fasta | 47,580.60  | 100.00% | 7  | 7  | 8  | 0.05% | 20.70% |
| Uncategorized Sample | BioSample 1 | (F001788) | Annexin A5 OS=Homo sapiens GN=ANXA5 PE=1 SV=2                                                         | ANXA5_HUMAN              | SwissProt_2014.08.fasta | 35,938.60  | 100.00% | 4  | 4  | 4  | 0.02% | 15.00% |
| Uncategorized Sample | BioSample 1 | (F001788) | Heterogeneous nuclear ribonucleoproteins A2/B1 OS=Homo sapiens GN=HNRNPA2B1 PE=1 SV=2                 | ROA2_HUMAN               | SwissProt_2014.08.fasta | 37,430.30  | 100.00% | 13 | 14 | 57 | 0.33% | 49.90% |
| Uncategorized Sample | BioSample 1 | (F001788) | Heterogeneous nuclear ribonucleoprotein A0 OS=Homo sapiens GN=HNRNPA0 PE=1 SV=1                       | ROA0_HUMAN               | SwissProt_2014.08.fasta | 30,840.50  | 99.80%  | 2  | 2  | 2  | 0.01% | 11.80% |
| Uncategorized Sample | BioSample 1 | (F001788) | Glial fibrillary acidic protein OS=Homo sapiens GN=GFAP PE=1 SV=1                                     | GFAP_HUMAN               | SwissProt_2014.08.fasta | 49,881.40  | 100.00% | 5  | 5  | 11 | 0.06% | 12.00% |
| Uncategorized Sample | BioSample 1 | (F001788) | L-lactate dehydrogenase A chain OS=Homo sapiens GN=LDHA PE=1 SV=2                                     | LDHA_HUMAN               | SwissProt_2014.08.fasta | 36,689.20  | 100.00% | 7  | 7  | 9  | 0.05% | 26.80% |



|                      |             |           |                                                                                                             |                          |                         |            |         |    |    |     |       |        |
|----------------------|-------------|-----------|-------------------------------------------------------------------------------------------------------------|--------------------------|-------------------------|------------|---------|----|----|-----|-------|--------|
| Uncategorized Sample | BioSample 1 | (F001788) | Syntaxin-1A OS=Homo sapiens GN=STX1A PE=1 SV=1                                                              | STX1A_HUMAN              | SwissProt_2014_08.fasta | 33,024.30  | 100.00% | 4  | 4  | 5   | 0.03% | 20.10% |
| Uncategorized Sample | BioSample 1 | (F001788) | Heterogeneous nuclear ribonucleoprotein H3 OS=Homo sapiens GN=HNRNP3 PE=1 SV=2                              | HNRH3_HUMAN              | SwissProt_2014_08.fasta | 36,927.60  | 100.00% | 3  | 3  | 4   | 0.02% | 14.50% |
| Uncategorized Sample | BioSample 1 | (F001788) | Malate dehydrogenase, mitochondrial OS=Homo sapiens GN=MDH2 PE=1 SV=3                                       | MDHM_HUMAN               | SwissProt_2014_08.fasta | 35,503.70  | 100.00% | 7  | 7  | 10  | 0.06% | 30.50% |
| Uncategorized Sample | BioSample 1 | (F001788) | Neurofilament light polypeptide OS=Homo sapiens GN=NFL PE=1 SV=3                                            | NFL_HUMAN                | SwissProt_2014_08.fasta | 61,517.80  | 100.00% | 6  | 6  | 7   | 0.04% | 12.30% |
| Uncategorized Sample | BioSample 1 | (F001788) | Tubulin alpha-4A chain OS=Homo sapiens GN=TUBA4A PE=1 SV=1                                                  | TBA4A_HUMAN              | SwissProt_2014_08.fasta | 49,924.60  | 99.80%  | 2  | 2  | 2   | 0.01% | 34.80% |
| Uncategorized Sample | BioSample 1 | (F001788) | Pyruvate dehydrogenase E1 component subunit beta, mitochondrial OS=Homo sapiens GN=PDHB PE=1 SV=3           | ODPB_HUMAN               | SwissProt_2014_08.fasta | 39,233.40  | 100.00% | 2  | 2  | 3   | 0.02% | 8.91%  |
| Uncategorized Sample | BioSample 1 | (F001788) | Charged multivesicular body protein 4b OS=Homo sapiens GN=CHMP4B PE=1 SV=1                                  | CHM4B_HUMAN              | SwissProt_2014_08.fasta | 24,951.20  | 100.00% | 5  | 5  | 13  | 0.08% | 34.80% |
| Uncategorized Sample | BioSample 1 | (F001788) | Versican core protein OS=Homo sapiens GN=VCAN PE=1 SV=3                                                     | CSPG2_HUMAN              | SwissProt_2014_08.fasta | 372,812.60 | 100.00% | 2  | 2  | 2   | 0.01% | 0.91%  |
| Uncategorized Sample | BioSample 1 | (F001788) | Phytoyl-CoA hydroxylase-interacting protein OS=Homo sapiens GN=PHYHIP PE=1 SV=1                             | PHYIP_HUMAN              | SwissProt_2014_08.fasta | 37,573.20  | 99.80%  | 2  | 2  | 3   | 0.02% | 7.27%  |
| Uncategorized Sample | BioSample 1 | (F001788) | Sideroflexin-3 OS=Homo sapiens GN=SFXN3 PE=1 SV=2                                                           | SFXN3_HUMAN              | SwissProt_2014_08.fasta | 35,979.10  | 100.00% | 3  | 3  | 3   | 0.02% | 13.20% |
| Uncategorized Sample | BioSample 1 | (F001788) | Tubulin beta chain OS=Homo sapiens GN=TUBB PE=1 SV=2                                                        | TBB5_HUMAN               | SwissProt_2014_08.fasta | 49,670.60  | 100.00% | 3  | 3  | 3   | 0.02% | 41.20% |
| Uncategorized Sample | BioSample 1 | (F001788) | Prohibitin-2 OS=Homo sapiens GN=PHB2 PE=1 SV=2                                                              | PHB2_HUMAN               | SwissProt_2014_08.fasta | 33,297.60  | 100.00% | 4  | 4  | 4   | 0.02% | 16.10% |
| Uncategorized Sample | BioSample 1 | (F001788) | Creatine kinase B-type OS=Homo sapiens GN=CKB PE=1 SV=1                                                     | KCRB_HUMAN               | SwissProt_2014_08.fasta | 42,645.10  | 100.00% | 6  | 7  | 16  | 0.09% | 20.50% |
| Uncategorized Sample | BioSample 1 | (F001788) | Actin, cytoplasmic 1 OS=Homo sapiens GN=ACTB PE=1 SV=1                                                      | ACTB_HUMAN,ACTG_HUMAN    | SwissProt_2014_08.fasta | 41,737.80  | 100.00% | 3  | 3  | 5   | 0.03% | 9.60%  |
| Uncategorized Sample | BioSample 1 | (F001788) | Tubulin alpha-1A chain OS=Homo sapiens GN=TUBA1A PE=1 SV=1                                                  | TBA1A_HUMAN              | SwissProt_2014_08.fasta | 50,135.70  | 100.00% | 12 | 16 | 23  | 0.14% | 41.00% |
| Uncategorized Sample | BioSample 1 | (F001788) | Clusterin OS=Homo sapiens GN=CLU PE=1 SV=1                                                                  | CLUS_HUMAN               | SwissProt_2014_08.fasta | 52,495.00  | 100.00% | 5  | 5  | 11  | 0.06% | 16.30% |
| Uncategorized Sample | BioSample 1 | (F001788) | L-lactate dehydrogenase B chain OS=Homo sapiens GN=LDHB PE=1 SV=2                                           | LDHB_HUMAN               | SwissProt_2014_08.fasta | 36,638.60  | 100.00% | 7  | 9  | 27  | 0.16% | 25.40% |
| Uncategorized Sample | BioSample 1 | (F001788) | Proteasome subunit alpha type-2 OS=Homo sapiens GN=PSMA2 PE=1 SV=2                                          | PSA2_HUMAN               | SwissProt_2014_08.fasta | 25,898.90  | 99.80%  | 2  | 2  | 2   | 0.01% | 17.10% |
| Uncategorized Sample | BioSample 1 | (F001788) | Carbonyl reductase [NADPH] 1 OS=Homo sapiens GN=CBR1 PE=1 SV=3                                              | CBR1_HUMAN               | SwissProt_2014_08.fasta | 30,374.80  | 100.00% | 8  | 9  | 13  | 0.08% | 37.90% |
| Uncategorized Sample | BioSample 1 | (F001788) | ATP synthase subunit gamma, mitochondrial OS=Homo sapiens GN=ATP5C1 PE=1 SV=1                               | ATPG_HUMAN               | SwissProt_2014_08.fasta | 32,998.00  | 100.00% | 2  | 2  | 2   | 0.01% | 8.99%  |
| Uncategorized Sample | BioSample 1 | (F001788) | Microtubule-associated protein RP/EB family member 2 OS=Homo sapiens GN=MAPRE2 PE=1 SV=1                    | MARE2_HUMAN              | SwissProt_2014_08.fasta | 37,031.60  | 100.00% | 2  | 2  | 2   | 0.01% | 11.30% |
| Uncategorized Sample | BioSample 1 | (F001788) | AcyI-coenzyme A thioesterase 8 OS=Homo sapiens GN=ACOT8 PE=1 SV=1                                           | ACOT8_HUMAN              | SwissProt_2014_08.fasta | 35,913.40  | 100.00% | 2  | 2  | 2   | 0.01% | 10.00% |
| Uncategorized Sample | BioSample 1 | (F001788) | Beta-soluble NSF attachment protein OS=Homo sapiens GN=NAPB PE=1 SV=2                                       | SNAB_HUMAN               | SwissProt_2014_08.fasta | 33,558.20  | 100.00% | 6  | 6  | 7   | 0.04% | 29.50% |
| Uncategorized Sample | BioSample 1 | (F001788) | NAD-dependent protein deacetylase sirtuin-2 OS=Homo sapiens GN=SIRT2 PE=1 SV=2                              | SIR2_HUMAN               | SwissProt_2014_08.fasta | 43,183.70  | 100.00% | 4  | 4  | 5   | 0.03% | 15.40% |
| Uncategorized Sample | BioSample 1 | (F001788) | Serine/threonine-protein phosphatase 2A catalytic subunit alpha isoform OS=Homo sapiens GN=PPP2CA PE=1 SV=1 | PP2AA_HUMAN,PP2AB_HUMAN  | SwissProt_2014_08.fasta | 35,594.50  | 99.80%  | 2  | 2  | 2   | 0.01% | 8.41%  |
| Uncategorized Sample | BioSample 1 | (F001788) | Ubiquitin-60S ribosomal protein L40 OS=Homo sapiens GN=UBA52 PE=1 SV=2                                      | RL40_HUMAN,RS27A_HUMAN,U | SwissProt_2014_08.fasta | 14,728.90  | 100.00% | 2  | 2  | 3   | 0.02% | 22.70% |
| Uncategorized Sample | BioSample 1 | (F001788) | Neurofilament medium polypeptide OS=Homo sapiens GN=NEFM PE=1 SV=3                                          | NFM_HUMAN                | SwissProt_2014_08.fasta | 102,471.30 | 100.00% | 3  | 3  | 3   | 0.02% | 5.57%  |
| Uncategorized Sample | BioSample 1 | (F001788) | Apolipoprotein E OS=Homo sapiens GN=APOE PE=1 SV=1                                                          | APOE_HUMAN               | SwissProt_2014_08.fasta | 36,153.50  | 100.00% | 10 | 10 | 18  | 0.11% | 39.70% |
| Uncategorized Sample | BioSample 1 | (F001788) | Calcium/calmodulin-dependent protein kinase type II subunit alpha OS=Homo sapiens GN=CAMK2A PE=1 SV=2       | KCC2A_HUMAN              | SwissProt_2014_08.fasta | 54,088.70  | 100.00% | 10 | 10 | 20  | 0.12% | 24.30% |
| Uncategorized Sample | BioSample 1 | (F001788) | Keratin, type II cytoskeletal 1 OS=Homo sapiens GN=KRT1 PE=1 SV=6                                           | K2C1_HUMAN               | SwissProt_2014_08.fasta | 66,640.30  | 100.00% | 5  | 5  | 5   | 0.03% | 9.63%  |
| Uncategorized Sample | BioSample 1 | (F001788) | Voltage-dependent anion-selective channel protein 1 OS=Homo sapiens GN=VDAC1 PE=1 SV=2                      | VDAC1_HUMAN              | SwissProt_2014_08.fasta | 30,773.90  | 100.00% | 11 | 11 | 41  | 0.24% | 48.80% |
| Uncategorized Sample | BioSample 1 | (F001789) | TAR DNA-binding protein 43 OS=Homo sapiens GN=TARDBP PE=1 SV=1                                              | TADBP_HUMAN              | SwissProt_2014_08.fasta | 44,739.70  | 100.00% | 7  | 8  | 11  | 0.06% | 21.00% |
| Uncategorized Sample | BioSample 1 | (F001789) | Isocitrate dehydrogenase [NADP], mitochondrial OS=Homo sapiens GN=IDH2 PE=1 SV=2                            | IDHP_HUMAN               | SwissProt_2014_08.fasta | 50,910.40  | 100.00% | 4  | 4  | 7   | 0.04% | 12.20% |
| Uncategorized Sample | BioSample 1 | (F001789) | Actin, alpha cardiac muscle 1 OS=Homo sapiens GN=ACTC1 PE=1 SV=1                                            | ACTC_HUMAN,ACTS_HUMAN    | SwissProt_2014_08.fasta | 42,020.10  | 100.00% | 2  | 2  | 2   | 0.01% | 30.80% |
| Uncategorized Sample | BioSample 1 | (F001789) | Adenosylhomocysteinase OS=Homo sapiens GN=AHCY PE=1 SV=4                                                    | SAHH_HUMAN               | SwissProt_2014_08.fasta | 47,717.10  | 100.00% | 4  | 4  | 4   | 0.02% | 9.49%  |
| Uncategorized Sample | BioSample 1 | (F001789) | Glutamine synthetase OS=Homo sapiens GN=GLUL PE=1 SV=4                                                      | GLNA_HUMAN               | SwissProt_2014_08.fasta | 42,064.90  | 100.00% | 2  | 2  | 2   | 0.01% | 7.51%  |
| Uncategorized Sample | BioSample 1 | (F001789) | Tubulin beta-4A chain OS=Homo sapiens GN=TUBB4A PE=1 SV=2                                                   | TBB4A_HUMAN              | SwissProt_2014_08.fasta | 49,585.50  | 100.00% | 10 | 10 | 13  | 0.07% | 32.40% |
| Uncategorized Sample | BioSample 1 | (F001789) | Neurofilament heavy polypeptide OS=Homo sapiens GN=NEFH PE=1 SV=4                                           | NFH_HUMAN                | SwissProt_2014_08.fasta | 112,480.10 | 100.00% | 3  | 3  | 3   | 0.02% | 4.09%  |
| Uncategorized Sample | BioSample 1 | (F001789) | Neuromodulin OS=Homo sapiens GN=GAP43 PE=1 SV=1                                                             | NEUM_HUMAN               | SwissProt_2014_08.fasta | 24,802.40  | 100.00% | 3  | 3  | 4   | 0.02% | 30.70% |
| Uncategorized Sample | BioSample 1 | (F001789) | Calcium/calmodulin-dependent protein kinase type II subunit beta OS=Homo sapiens GN=CAMK2B PE=1 SV=3        | KCC2B_HUMAN              | SwissProt_2014_08.fasta | 72,678.70  | 100.00% | 2  | 2  | 3   | 0.02% | 8.86%  |
| Uncategorized Sample | BioSample 1 | (F001789) | cAMP-dependent protein kinase catalytic subunit beta OS=Homo sapiens GN=PRKACB PE=1 SV=2                    | KAPCB_HUMAN              | SwissProt_2014_08.fasta | 40,624.40  | 100.00% | 3  | 3  | 3   | 0.02% | 10.80% |
| Uncategorized Sample | BioSample 1 | (F001789) | Heterogeneous nuclear ribonucleoprotein D0 OS=Homo sapiens GN=HNRNPD PE=1 SV=1                              | HNRPD_HUMAN              | SwissProt_2014_08.fasta | 38,434.50  | 100.00% | 4  | 4  | 8   | 0.05% | 16.60% |
| Uncategorized Sample | BioSample 1 | (F001789) | Phosphoglycerate kinase 1 OS=Homo sapiens GN=PGK1 PE=1 SV=3                                                 | PGK1_HUMAN               | SwissProt_2014_08.fasta | 44,615.30  | 100.00% | 3  | 4  | 6   | 0.03% | 9.11%  |
| Uncategorized Sample | BioSample 1 | (F001789) | Complement C4-A OS=Homo sapiens GN=C4A PE=1 SV=2                                                            | CO4A_HUMAN               | SwissProt_2014_08.fasta | 192,786.80 | 100.00% | 3  | 3  | 3   | 0.02% | 2.81%  |
| Uncategorized Sample | BioSample 1 | (F001789) | Creatine kinase U-type, mitochondrial OS=Homo sapiens GN=CKMT1A PE=1 SV=1                                   | KCRU_HUMAN               | SwissProt_2014_08.fasta | 47,038.00  | 100.00% | 6  | 6  | 10  | 0.06% | 19.70% |
| Uncategorized Sample | BioSample 1 | (F001789) | Fructose-bisphosphate aldolase C OS=Homo sapiens GN=ALDOC PE=1 SV=2                                         | ALDOC_HUMAN              | SwissProt_2014_08.fasta | 39,456.20  | 100.00% | 3  | 3  | 4   | 0.02% | 11.30% |
| Uncategorized Sample | BioSample 1 | (F001789) | Fructose-bisphosphate aldolase A OS=Homo sapiens GN=ALDOA PE=1 SV=2                                         | ALDOA_HUMAN              | SwissProt_2014_08.fasta | 39,420.60  | 99.80%  | 2  | 2  | 2   | 0.01% | 8.79%  |
| Uncategorized Sample | BioSample 1 | (F001789) | Alpha-centractin OS=Homo sapiens GN=ACTR1A PE=1 SV=1                                                        | ACTZ_HUMAN               | SwissProt_2014_08.fasta | 42,615.20  | 99.80%  | 2  | 2  | 2   | 0.01% | 9.84%  |
| Uncategorized Sample | BioSample 1 | (F001789) | Erlin-2 OS=Homo sapiens GN=ERLIN2 PE=1 SV=1                                                                 | ERLN2_HUMAN              | SwissProt_2014_08.fasta | 37,840.40  | 100.00% | 4  | 4  | 5   | 0.03% | 15.00% |
| Uncategorized Sample | BioSample 1 | (F001789) | Keratin, type I cytoskeletal 9 OS=Homo sapiens GN=KRT9 PE=1 SV=3                                            | K1C9_HUMAN               | SwissProt_2014_08.fasta | 62,065.90  | 99.80%  | 2  | 2  | 2   | 0.01% | 5.78%  |
| Uncategorized Sample | BioSample 1 | (F001789) | Actin, cytoplasmic 1 OS=Homo sapiens GN=ACTB PE=1 SV=1                                                      | ACTB_HUMAN,ACTG_HUMAN    | SwissProt_2014_08.fasta | 41,737.80  | 100.00% | 15 | 20 | 127 | 0.73% | 48.80% |
| Uncategorized Sample | BioSample 1 | (F001789) | Flotillin-2 OS=Homo sapiens GN=FLOT2 PE=1 SV=2                                                              | FLOT2_HUMAN              | SwissProt_2014_08.fasta | 47,063.90  | 100.00% | 3  | 3  | 3   | 0.02% | 8.64%  |
| Uncategorized Sample | BioSample 1 | (F001789) | Tubulin beta-4B chain OS=Homo sapiens GN=TUBB4B PE=1 SV=1                                                   | TBB4B_HUMAN              | SwissProt_2014_08.fasta | 49,830.70  | 100.00% | 4  | 4  | 5   | 0.03% | 43.70% |
| Uncategorized Sample | BioSample 1 | (F001789) | Ferritin light chain OS=Homo sapiens GN=FTL PE=1 SV=2                                                       | FRIL_HUMAN               | SwissProt_2014_08.fasta | 20,020.60  | 100.00% | 3  | 3  | 3   | 0.02% | 17.70% |
| Uncategorized Sample | BioSample 1 | (F001789) | Endophilin-A1 OS=Homo sapiens GN=SH3GL2 PE=1 SV=1                                                           | SH3G2_HUMAN              | SwissProt_2014_08.fasta | 39,963.20  | 100.00% | 2  | 2  | 2   | 0.01% | 7.95%  |
| Uncategorized Sample | BioSample 1 | (F001789) | 2',3'-cyclic-nucleotide 3'-phosphodiesterase OS=Homo sapiens GN=CNP PE=1 SV=2                               | CN37_HUMAN               | SwissProt_2014_08.fasta | 47,580.60  | 100.00% | 23 | 27 | 87  | 0.50% | 48.70% |
| Uncategorized Sample | BioSample 1 | (F001789) | Heterogeneous nuclear ribonucleoproteins A2/B1 OS=Homo sapiens GN=HNRNPA2B1 PE=1 SV=2                       | ROA2_HUMAN               | SwissProt_2014_08.fasta | 37,430.30  | 100.00% | 3  | 3  | 3   | 0.02% | 9.63%  |
| Uncategorized Sample | BioSample 1 | (F001789) | Glial fibrillary acidic protein OS=Homo sapiens GN=GFAP PE=1 SV=1                                           | GFAP_HUMAN               | SwissProt_2014_08.fasta | 49,881.40  | 100.00% | 29 | 33 | 258 | 1.49% | 63.90% |

|                      |             |           |                                                                                                       |                         |                         |            |         |    |    |     |       |        |
|----------------------|-------------|-----------|-------------------------------------------------------------------------------------------------------|-------------------------|-------------------------|------------|---------|----|----|-----|-------|--------|
| Uncategorized Sample | BioSample 1 | (F001789) | RNA-binding motif protein, X chromosome OS=Homo sapiens GN=RBMX PE=1 SV=3                             | RBMX_HUMAN              | SwissProt_2014_08.fasta | 42,333.70  | 100.00% | 2  | 2  | 2   | 0.01% | 6.91%  |
| Uncategorized Sample | BioSample 1 | (F001789) | Microtubule-associated protein tau OS=Homo sapiens GN=MAPT PE=1 SV=5                                  | TAU_HUMAN               | SwissProt_2014_08.fasta | 78,927.70  | 99.80%  | 2  | 2  | 3   | 0.02% | 3.83%  |
| Uncategorized Sample | BioSample 1 | (F001789) | ATP synthase subunit alpha, mitochondrial OS=Homo sapiens GN=ATP5A1 PE=1 SV=1                         | ATPA_HUMAN              | SwissProt_2014_08.fasta | 59,752.10  | 100.00% | 3  | 3  | 3   | 0.02% | 7.05%  |
| Uncategorized Sample | BioSample 1 | (F001789) | Keratin, type II cytoskeletal 2 epidermal OS=Homo sapiens GN=KRT2 PE=1 SV=2                           | K2ZE_HUMAN              | SwissProt_2014_08.fasta | 65,433.90  | 99.80%  | 2  | 2  | 2   | 0.01% | 7.67%  |
| Uncategorized Sample | BioSample 1 | (F001789) | Flotillin-1 OS=Homo sapiens GN=FLOT1 PE=1 SV=3                                                        | FLOT1_HUMAN             | SwissProt_2014_08.fasta | 47,354.80  | 100.00% | 2  | 2  | 2   | 0.01% | 5.39%  |
| Uncategorized Sample | BioSample 1 | (F001789) | Neurofilament light polypeptide OS=Homo sapiens GN=NEFL PE=1 SV=3                                     | NFL_HUMAN               | SwissProt_2014_08.fasta | 61,517.80  | 100.00% | 19 | 19 | 34  | 0.20% | 50.30% |
| Uncategorized Sample | BioSample 1 | (F001789) | Heterogeneous nuclear ribonucleoprotein M OS=Homo sapiens GN=HNRNPM PE=1 SV=3                         | HNRPM_HUMAN             | SwissProt_2014_08.fasta | 77,517.30  | 100.00% | 2  | 2  | 2   | 0.01% | 2.47%  |
| Uncategorized Sample | BioSample 1 | (F001789) | Band 4.1-like protein 3 OS=Homo sapiens GN=EPB41L3 PE=1 SV=2                                          | E41L3_HUMAN             | SwissProt_2014_08.fasta | 120,679.80 | 100.00% | 3  | 3  | 3   | 0.02% | 3.96%  |
| Uncategorized Sample | BioSample 1 | (F001789) | Versican core protein OS=Homo sapiens GN=VCAN PE=1 SV=3                                               | CSPG2_HUMAN             | SwissProt_2014_08.fasta | 372,812.60 | 100.00% | 3  | 3  | 4   | 0.02% | 1.21%  |
| Uncategorized Sample | BioSample 1 | (F001789) | Heterogeneous nuclear ribonucleoprotein K OS=Homo sapiens GN=HNRNPK PE=1 SV=1                         | HNRPK_HUMAN             | SwissProt_2014_08.fasta | 50,978.50  | 99.80%  | 2  | 2  | 2   | 0.01% | 3.89%  |
| Uncategorized Sample | BioSample 1 | (F001789) | Alpha-internexin OS=Homo sapiens GN=INA PE=1 SV=2                                                     | AINX_HUMAN              | SwissProt_2014_08.fasta | 55,392.30  | 100.00% | 11 | 11 | 16  | 0.09% | 26.50% |
| Uncategorized Sample | BioSample 1 | (F001789) | Creatine kinase B-type OS=Homo sapiens GN=CKB PE=1 SV=1                                               | KCRB_HUMAN              | SwissProt_2014_08.fasta | 42,645.10  | 100.00% | 14 | 19 | 80  | 0.46% | 50.90% |
| Uncategorized Sample | BioSample 1 | (F001789) | DnaJ homolog subfamily B member 2 OS=Homo sapiens GN=DNAJB2 PE=1 SV=3                                 | DNJB2_HUMAN             | SwissProt_2014_08.fasta | 35,580.70  | 100.00% | 4  | 4  | 4   | 0.02% | 15.40% |
| Uncategorized Sample | BioSample 1 | (F001789) | Heterogeneous nuclear ribonucleoprotein H OS=Homo sapiens GN=HNRNPH1 PE=1 SV=4                        | HNRH1_HUMAN,HNRH2_HUMAN | SwissProt_2014_08.fasta | 49,229.80  | 99.80%  | 2  | 2  | 2   | 0.01% | 7.35%  |
| Uncategorized Sample | BioSample 1 | (F001789) | Brain acid soluble protein 1 OS=Homo sapiens GN=BASP1 PE=1 SV=2                                       | BASP1_HUMAN             | SwissProt_2014_08.fasta | 22,693.30  | 99.80%  | 2  | 2  | 2   | 0.01% | 22.90% |
| Uncategorized Sample | BioSample 1 | (F001789) | Tubulin alpha-1A chain OS=Homo sapiens GN=TUBA1A PE=1 SV=1                                            | TBA1A_HUMAN             | SwissProt_2014_08.fasta | 50,135.70  | 100.00% | 5  | 5  | 6   | 0.03% | 14.90% |
| Uncategorized Sample | BioSample 1 | (F001789) | Arf-GAP with GTPase, ANK repeat and PH domain-containing protein 3 OS=Homo sapiens GN=AGAP3 PE=1 SV=1 | AGAP3_HUMAN             | SwissProt_2014_08.fasta | 95,045.00  | 99.90%  | 2  | 2  | 2   | 0.01% | 3.20%  |
| Uncategorized Sample | BioSample 1 | (F001789) | Succinyl-CoA ligase [ADP-forming] subunit beta, mitochondrial OS=Homo sapiens GN=SUCLA2 PE=1 SV=3     | SUCB1_HUMAN             | SwissProt_2014_08.fasta | 50,318.10  | 100.00% | 2  | 2  | 2   | 0.01% | 4.32%  |
| Uncategorized Sample | BioSample 1 | (F001789) | Septin-2 OS=Homo sapiens GN=SEPT2 PE=1 SV=1                                                           | SEPT2_HUMAN             | SwissProt_2014_08.fasta | 41,488.20  | 100.00% | 5  | 5  | 5   | 0.03% | 21.60% |
| Uncategorized Sample | BioSample 1 | (F001789) | Keratin, type II cytoskeletal 1 OS=Homo sapiens GN=KRT1 PE=1 SV=6                                     | K2C1_HUMAN              | SwissProt_2014_08.fasta | 66,040.30  | 100.00% | 3  | 3  | 3   | 0.02% | 7.61%  |
| Uncategorized Sample | BioSample 1 | (F001789) | Calcium/calmodulin-dependent protein kinase type II subunit alpha OS=Homo sapiens GN=CAMK2A PE=1 SV=2 | KCC2A_HUMAN             | SwissProt_2014_08.fasta | 54,088.70  | 100.00% | 9  | 10 | 18  | 0.10% | 23.60% |
| Uncategorized Sample | BioSample 1 | (F001789) | Dihydropyrimidinase-related protein 2 OS=Homo sapiens GN=DPYSL2 PE=1 SV=1                             | DPYL2_HUMAN             | SwissProt_2014_08.fasta | 62,294.00  | 99.80%  | 2  | 2  | 3   | 0.02% | 3.67%  |
| Uncategorized Sample | BioSample 1 | (F001789) | Myelin proteolipid protein OS=Homo sapiens GN=PLP1 PE=1 SV=2                                          | MYPR_HUMAN              | SwissProt_2014_08.fasta | 30,077.70  | 99.80%  | 2  | 2  | 2   | 0.01% | 8.66%  |
| Uncategorized Sample | BioSample 1 | (F001789) | Vimentin OS=Homo sapiens GN=VIM PE=1 SV=4                                                             | VIME_HUMAN              | SwissProt_2014_08.fasta | 53,652.70  | 100.00% | 3  | 3  | 3   | 0.02% | 8.15%  |
| Uncategorized Sample | BioSample 1 | (F001789) | Neurofilament medium polypeptide OS=Homo sapiens GN=NEFM PE=1 SV=3                                    | NFM_HUMAN               | SwissProt_2014_08.fasta | 102,471.30 | 100.00% | 12 | 12 | 17  | 0.10% | 16.20% |
| Uncategorized Sample | BioSample 1 | (F001789) | Ferritin heavy chain OS=Homo sapiens GN=FTH1 PE=1 SV=2                                                | FRIH_HUMAN              | SwissProt_2014_08.fasta | 21,226.20  | 99.80%  | 2  | 2  | 3   | 0.02% | 10.90% |
| Uncategorized Sample | BioSample 1 | (F001789) | Elongation factor Tu, mitochondrial OS=Homo sapiens GN=TUFM PE=1 SV=2                                 | EFTU_HUMAN              | SwissProt_2014_08.fasta | 49,542.40  | 100.00% | 10 | 12 | 21  | 0.12% | 25.40% |
| Uncategorized Sample | BioSample 1 | (F001790) | TAR DNA-binding protein 43 OS=Homo sapiens GN=TARDBP PE=1 SV=1                                        | TADBP_HUMAN             | SwissProt_2014_08.fasta | 44,739.70  | 100.00% | 5  | 5  | 11  | 0.06% | 15.90% |
| Uncategorized Sample | BioSample 1 | (F001790) | Alpha-internexin OS=Homo sapiens GN=INA PE=1 SV=2                                                     | AINX_HUMAN              | SwissProt_2014_08.fasta | 55,392.30  | 100.00% | 14 | 14 | 18  | 0.10% | 37.90% |
| Uncategorized Sample | BioSample 1 | (F001790) | Tubulin beta-4A chain OS=Homo sapiens GN=TUBB4A PE=1 SV=2                                             | TBB4A_HUMAN             | SwissProt_2014_08.fasta | 49,585.50  | 100.00% | 10 | 10 | 15  | 0.09% | 32.40% |
| Uncategorized Sample | BioSample 1 | (F001790) | Neuromodulin OS=Homo sapiens GN=GAP43 PE=1 SV=1                                                       | NEUM_HUMAN              | SwissProt_2014_08.fasta | 24,802.40  | 100.00% | 6  | 6  | 21  | 0.12% | 47.50% |
| Uncategorized Sample | BioSample 1 | (F001790) | Sodium/potassium-transporting ATPase subunit beta-1 OS=Homo sapiens GN=ATP1B1 PE=1 SV=1               | AT1B1_HUMAN             | SwissProt_2014_08.fasta | 35,062.90  | 99.80%  | 2  | 2  | 3   | 0.02% | 7.26%  |
| Uncategorized Sample | BioSample 1 | (F001790) | Elongation factor 1-alpha 1 OS=Homo sapiens GN=EEF1A1 PE=1 SV=1                                       | EF1A1_HUMAN,EF1A3_HUMAN | SwissProt_2014_08.fasta | 50,141.20  | 100.00% | 3  | 3  | 4   | 0.02% | 9.96%  |
| Uncategorized Sample | BioSample 1 | (F001790) | Complement C4-A OS=Homo sapiens GN=C4A PE=1 SV=2                                                      | CO4A_HUMAN              | SwissProt_2014_08.fasta | 192,786.80 | 99.90%  | 2  | 2  | 2   | 0.01% | 1.38%  |
| Uncategorized Sample | BioSample 1 | (F001790) | Neurofilament light polypeptide OS=Homo sapiens GN=NEFL PE=1 SV=3                                     | NFL_HUMAN               | SwissProt_2014_08.fasta | 61,517.80  | 100.00% | 12 | 12 | 52  | 0.30% | 28.70% |
| Uncategorized Sample | BioSample 1 | (F001790) | Tubulin beta-2A chain OS=Homo sapiens GN=TUBB2A PE=1 SV=1                                             | TBB2A_HUMAN             | SwissProt_2014_08.fasta | 49,907.10  | 99.80%  | 2  | 2  | 3   | 0.02% | 21.30% |
| Uncategorized Sample | BioSample 1 | (F001790) | Eukaryotic initiation factor 4A-II OS=Homo sapiens GN=EIF4A2 PE=1 SV=2                                | IF4A2_HUMAN             | SwissProt_2014_08.fasta | 46,403.80  | 100.00% | 4  | 4  | 4   | 0.02% | 13.30% |
| Uncategorized Sample | BioSample 1 | (F001790) | Peroxisomal multifunctional enzyme type 2 OS=Homo sapiens GN=HSD17B4 PE=1 SV=3                        | DHB4_HUMAN              | SwissProt_2014_08.fasta | 79,688.50  | 99.80%  | 2  | 2  | 2   | 0.01% | 4.48%  |
| Uncategorized Sample | BioSample 1 | (F001790) | Flotillin-2 OS=Homo sapiens GN=FLOT2 PE=1 SV=2                                                        | FLOT2_HUMAN             | SwissProt_2014_08.fasta | 47,063.90  | 100.00% | 19 | 21 | 104 | 0.60% | 43.70% |
| Uncategorized Sample | BioSample 1 | (F001790) | Non-specific lipid-transfer protein OS=Homo sapiens GN=SCP2 PE=1 SV=2                                 | NLTP_HUMAN              | SwissProt_2014_08.fasta | 58,994.60  | 100.00% | 4  | 4  | 5   | 0.03% | 7.50%  |
| Uncategorized Sample | BioSample 1 | (F001790) | 2',3'-cyclic-nucleotide 3'-phosphodiesterase OS=Homo sapiens GN=CNP PE=1 SV=2                         | CN37_HUMAN              | SwissProt_2014_08.fasta | 47,580.60  | 100.00% | 17 | 18 | 45  | 0.26% | 35.60% |
| Uncategorized Sample | BioSample 1 | (F001790) | Glial fibrillary acidic protein OS=Homo sapiens GN=GFAP PE=1 SV=1                                     | GFAP_HUMAN              | SwissProt_2014_08.fasta | 49,881.40  | 100.00% | 25 | 28 | 217 | 1.24% | 50.20% |
| Uncategorized Sample | BioSample 1 | (F001790) | Flotillin-1 OS=Homo sapiens GN=FLOT1 PE=1 SV=3                                                        | FLOT1_HUMAN             | SwissProt_2014_08.fasta | 47,354.80  | 100.00% | 24 | 30 | 180 | 1.03% | 61.60% |
| Uncategorized Sample | BioSample 1 | (F001790) | Platelet-activating factor acetylhydrolase IB subunit alpha OS=Homo sapiens GN=PFAH1B1 PE=1 SV=2      | LIS1_HUMAN              | SwissProt_2014_08.fasta | 46,637.40  | 99.90%  | 2  | 2  | 2   | 0.01% | 5.37%  |
| Uncategorized Sample | BioSample 1 | (F001790) | Tubulin alpha-4A chain OS=Homo sapiens GN=TUBA4A PE=1 SV=1                                            | TBA4A_HUMAN             | SwissProt_2014_08.fasta | 49,924.60  | 99.80%  | 2  | 2  | 2   | 0.01% | 30.60% |
| Uncategorized Sample | BioSample 1 | (F001790) | Versican core protein OS=Homo sapiens GN=VCAN PE=1 SV=3                                               | CSPG2_HUMAN             | SwissProt_2014_08.fasta | 372,812.60 | 100.00% | 3  | 3  | 4   | 0.02% | 1.09%  |
| Uncategorized Sample | BioSample 1 | (F001790) | Synaptic vesicle membrane protein VAT-1 homolog OS=Homo sapiens GN=VAT1 PE=1 SV=2                     | VAT1_HUMAN              | SwissProt_2014_08.fasta | 41,919.80  | 100.00% | 2  | 2  | 3   | 0.02% | 7.63%  |
| Uncategorized Sample | BioSample 1 | (F001790) | Creatine kinase B-type OS=Homo sapiens GN=CKB PE=1 SV=1                                               | KCRB_HUMAN              | SwissProt_2014_08.fasta | 42,645.10  | 100.00% | 3  | 3  | 4   | 0.02% | 12.60% |
| Uncategorized Sample | BioSample 1 | (F001790) | Actin, cytoplasmic 1 OS=Homo sapiens GN=ACTB PE=1 SV=1                                                | ACTB_HUMAN,ACTG_HUMAN   | SwissProt_2014_08.fasta | 41,737.80  | 100.00% | 6  | 6  | 25  | 0.14% | 17.60% |
| Uncategorized Sample | BioSample 1 | (F001790) | Tubulin alpha-1A chain OS=Homo sapiens GN=TUBA1A PE=1 SV=1                                            | TBA1A_HUMAN             | SwissProt_2014_08.fasta | 50,135.70  | 100.00% | 10 | 11 | 30  | 0.17% | 32.40% |
| Uncategorized Sample | BioSample 1 | (F001790) | PH and SEC7 domain-containing protein 3 OS=Homo sapiens GN=PSD3 PE=1 SV=2                             | PSD3_HUMAN              | SwissProt_2014_08.fasta | 116,035.90 | 100.00% | 4  | 4  | 4   | 0.02% | 6.11%  |
| Uncategorized Sample | BioSample 1 | (F001790) | Neurofilament medium polypeptide OS=Homo sapiens GN=NEFM PE=1 SV=3                                    | NFM_HUMAN               | SwissProt_2014_08.fasta | 102,471.30 | 100.00% | 14 | 14 | 31  | 0.18% | 16.90% |
| Uncategorized Sample | BioSample 1 | (F001790) | Vimentin OS=Homo sapiens GN=VIM PE=1 SV=4                                                             | VIME_HUMAN              | SwissProt_2014_08.fasta | 53,652.70  | 99.80%  | 2  | 2  | 2   | 0.01% | 10.10% |
| Uncategorized Sample | BioSample 1 | (F001790) | Elongation factor Tu, mitochondrial OS=Homo sapiens GN=TUFM PE=1 SV=2                                 | EFTU_HUMAN              | SwissProt_2014_08.fasta | 49,542.40  | 100.00% | 4  | 4  | 5   | 0.03% | 10.40% |
| Uncategorized Sample | BioSample 1 | (F001790) | Calcium/calmodulin-dependent protein kinase type II subunit alpha OS=Homo sapiens GN=CAMK2A PE=1 SV=2 | KCC2A_HUMAN             | SwissProt_2014_08.fasta | 54,088.70  | 100.00% | 14 | 15 | 153 | 0.88% | 32.00% |
| Uncategorized Sample | BioSample 1 | (F001791) | Pyruvate kinase PKM OS=Homo sapiens GN=PKM PE=1 SV=4                                                  | KPYM_HUMAN              | SwissProt_2014_08.fasta | 57,937.50  | 99.80%  | 13 | 14 | 32  | 0.18% | 32.40% |
| Uncategorized Sample | BioSample 1 | (F001791) | Succinyl-CoA:3-ketoacid coenzyme A transferase 1, mitochondrial OS=Homo sapiens GN=OXCT1 PE=1 SV=1    | SCOT1_HUMAN             | SwissProt_2014_08.fasta | 56,158.80  | 99.80%  | 2  | 2  | 3   | 0.02% | 7.50%  |
| Uncategorized Sample | BioSample 1 | (F001791) | TAR DNA-binding protein 43 OS=Homo sapiens GN=TARDBP PE=1 SV=1                                        | TADBP_HUMAN             | SwissProt_2014_08.fasta | 44,739.70  | 100.00% | 2  | 2  | 5   | 0.03% | 7.25%  |

|                      |             |           |                                                                                                       |                          |                         |            |         |    |    |     |       |        |
|----------------------|-------------|-----------|-------------------------------------------------------------------------------------------------------|--------------------------|-------------------------|------------|---------|----|----|-----|-------|--------|
| Uncategorized Sample | BioSample 1 | (F001791) | Alpha-intermexin OS=Homo sapiens GN=INA PE=1 SV=2                                                     | AIXN_HUMAN               | SwissProt_2014.08.fasta | 55,392.30  | 100.00% | 23 | 29 | 306 | 1.69% | 53.30% |
| Uncategorized Sample | BioSample 1 | (F001791) | Rab GDP dissociation inhibitor alpha OS=Homo sapiens GN=GD1I PE=1 SV=2                                | GDIA_HUMAN               | SwissProt_2014.08.fasta | 50,584.10  | 100.00% | 5  | 5  | 6   | 0.03% | 21.50% |
| Uncategorized Sample | BioSample 1 | (F001791) | Tubulin beta-4A chain OS=Homo sapiens GN=TUBB4A PE=1 SV=2                                             | TBB4A_HUMAN              | SwissProt_2014.08.fasta | 49,585.50  | 100.00% | 14 | 14 | 29  | 0.16% | 44.60% |
| Uncategorized Sample | BioSample 1 | (F001791) | Calcium/calmodulin-dependent protein kinase type II subunit delta OS=Homo sapiens GN=CAMK2D PE=1 SV=3 | KCC2D_HUMAN              | SwissProt_2014.08.fasta | 56,370.70  | 100.00% | 8  | 9  | 113 | 0.63% | 28.10% |
| Uncategorized Sample | BioSample 1 | (F001791) | Calcium/calmodulin-dependent protein kinase type II subunit beta OS=Homo sapiens GN=CAMK2B PE=1 SV=3  | KCC2B_HUMAN              | SwissProt_2014.08.fasta | 72,678.70  | 100.00% | 7  | 9  | 69  | 0.38% | 23.90% |
| Uncategorized Sample | BioSample 1 | (F001791) | Ubiquitin-60S ribosomal protein L40 OS=Homo sapiens GN=UBA52 PE=1 SV=2                                | RL40_HUMAN,RS27A_HUMAN,U | SwissProt_2014.08.fasta | 14,728.90  | 100.00% | 2  | 2  | 3   | 0.02% | 19.50% |
| Uncategorized Sample | BioSample 1 | (F001791) | Neurofilament light polypeptide OS=Homo sapiens GN=NEFL PE=1 SV=3                                     | NFL_HUMAN                | SwissProt_2014.08.fasta | 61,517.80  | 100.00% | 16 | 16 | 53  | 0.29% | 42.70% |
| Uncategorized Sample | BioSample 1 | (F001791) | Tubulin beta-2A chain OS=Homo sapiens GN=TUBB2A PE=1 SV=1                                             | TBB2A_HUMAN              | SwissProt_2014.08.fasta | 49,907.10  | 100.00% | 5  | 5  | 7   | 0.04% | 39.80% |
| Uncategorized Sample | BioSample 1 | (F001791) | Vimentin OS=Homo sapiens GN=VIM PE=1 SV=4                                                             | VIME_HUMAN               | SwissProt_2014.08.fasta | 53,652.70  | 100.00% | 16 | 18 | 41  | 0.23% | 35.80% |
| Uncategorized Sample | BioSample 1 | (F001791) | Tubulin beta-4B chain OS=Homo sapiens GN=TUBB4B PE=1 SV=1                                             | TBB4B_HUMAN              | SwissProt_2014.08.fasta | 49,830.70  | 100.00% | 2  | 2  | 2   | 0.01% | 37.10% |
| Uncategorized Sample | BioSample 1 | (F001791) | Neurofilament medium polypeptide OS=Homo sapiens GN=NEFM PE=1 SV=3                                    | NFM_HUMAN                | SwissProt_2014.08.fasta | 102,471.30 | 100.00% | 14 | 15 | 31  | 0.17% | 20.40% |
| Uncategorized Sample | BioSample 1 | (F001791) | Calcium/calmodulin-dependent protein kinase type II subunit gamma OS=Homo sapiens GN=CAMK2G PE=1 SV=3 | KCC2G_HUMAN              | SwissProt_2014.08.fasta | 62,610.00  | 100.00% | 4  | 5  | 17  | 0.09% | 21.00% |
| Uncategorized Sample | BioSample 1 | (F001791) | Glial fibrillary acidic protein OS=Homo sapiens GN=GFAP PE=1 SV=1                                     | GFAP_HUMAN               | SwissProt_2014.08.fasta | 49,881.40  | 100.00% | 9  | 9  | 19  | 0.11% | 25.00% |
| Uncategorized Sample | BioSample 1 | (F001791) | Microtubule-associated protein tau OS=Homo sapiens GN=MAPT PE=1 SV=5                                  | TAU_HUMAN                | SwissProt_2014.08.fasta | 78,927.70  | 100.00% | 7  | 9  | 24  | 0.13% | 12.10% |
| Uncategorized Sample | BioSample 1 | (F001791) | Dihydropyrimidinase-related protein 1 OS=Homo sapiens GN=CRMP1 PE=1 SV=1                              | DPYL1_HUMAN              | SwissProt_2014.08.fasta | 62,184.70  | 100.00% | 4  | 4  | 8   | 0.04% | 9.44%  |
| Uncategorized Sample | BioSample 1 | (F001791) | Dihydropyrimidinase-related protein 2 OS=Homo sapiens GN=DPYL2 PE=1 SV=1                              | DPYL2_HUMAN              | SwissProt_2014.08.fasta | 62,294.00  | 100.00% | 14 | 16 | 40  | 0.22% | 42.80% |
| Uncategorized Sample | BioSample 1 | (F001791) | Fibrinogen beta chain OS=Homo sapiens GN=FGB PE=1 SV=2                                                | FIBB_HUMAN               | SwissProt_2014.08.fasta | 55,928.60  | 100.00% | 3  | 3  | 3   | 0.02% | 9.78%  |
| Uncategorized Sample | BioSample 1 | (F001791) | Vesicle-fusing ATPase OS=Homo sapiens GN=NSF PE=1 SV=3                                                | NSF_HUMAN                | SwissProt_2014.08.fasta | 82,597.40  | 100.00% | 3  | 3  | 3   | 0.02% | 4.44%  |
| Uncategorized Sample | BioSample 1 | (F001791) | Versican core protein OS=Homo sapiens GN=VCAN PE=1 SV=3                                               | CSPG2_HUMAN              | SwissProt_2014.08.fasta | 372,812.60 | 100.00% | 5  | 7  | 36  | 0.20% | 1.65%  |
| Uncategorized Sample | BioSample 1 | (F001791) | Copine-6 OS=Homo sapiens GN=CPNE6 PE=1 SV=3                                                           | CPNE6_HUMAN              | SwissProt_2014.08.fasta | 61,991.20  | 99.80%  | 2  | 2  | 2   | 0.01% | 3.59%  |
| Uncategorized Sample | BioSample 1 | (F001791) | Propionyl-CoA carboxylase beta chain, mitochondrial OS=Homo sapiens GN=PCCB PE=1 SV=3                 | PCCB_HUMAN               | SwissProt_2014.08.fasta | 58,216.00  | 100.00% | 4  | 4  | 4   | 0.02% | 10.90% |
| Uncategorized Sample | BioSample 1 | (F001791) | Dihydropyrimidinase-related protein 3 OS=Homo sapiens GN=DPYL3 PE=1 SV=1                              | DPYL3_HUMAN              | SwissProt_2014.08.fasta | 61,964.10  | 100.00% | 3  | 3  | 3   | 0.02% | 18.90% |
| Uncategorized Sample | BioSample 1 | (F001791) | Methylcrotonyl-CoA carboxylase beta chain, mitochondrial OS=Homo sapiens GN=MCCC2 PE=1 SV=1           | MCCB_HUMAN               | SwissProt_2014.08.fasta | 61,334.70  | 100.00% | 6  | 7  | 17  | 0.09% | 16.30% |
| Uncategorized Sample | BioSample 1 | (F001791) | Cytosol aminopeptidase OS=Homo sapiens GN=LAP3 PE=1 SV=3                                              | AMPL_HUMAN               | SwissProt_2014.08.fasta | 56,167.80  | 100.00% | 2  | 2  | 2   | 0.01% | 4.43%  |
| Uncategorized Sample | BioSample 1 | (F001791) | Endonuclease domain-containing 1 protein OS=Homo sapiens GN=ENDOD1 PE=1 SV=2                          | ENDD1_HUMAN              | SwissProt_2014.08.fasta | 55,017.60  | 100.00% | 7  | 7  | 14  | 0.08% | 21.80% |
| Uncategorized Sample | BioSample 1 | (F001791) | Glucose-6-phosphate isomerase OS=Homo sapiens GN=GPI PE=1 SV=4                                        | G6PI_HUMAN               | SwissProt_2014.08.fasta | 63,148.50  | 100.00% | 3  | 3  | 6   | 0.03% | 8.42%  |
| Uncategorized Sample | BioSample 1 | (F001791) | Protein kinase C gamma type OS=Homo sapiens GN=PRKCG PE=1 SV=3                                        | KPCG_HUMAN               | SwissProt_2014.08.fasta | 78,448.70  | 100.00% | 3  | 3  | 3   | 0.02% | 6.74%  |
| Uncategorized Sample | BioSample 1 | (F001791) | Tubulin alpha-1A chain OS=Homo sapiens GN=TUBA1A PE=1 SV=1                                            | TBA1A_HUMAN              | SwissProt_2014.08.fasta | 50,135.70  | 100.00% | 3  | 3  | 3   | 0.02% | 9.98%  |
| Uncategorized Sample | BioSample 1 | (F001791) | Keratin, type II cytoskeletal 2 epidermal OS=Homo sapiens GN=KRT2 PE=1 SV=2                           | K2E2_HUMAN               | SwissProt_2014.08.fasta | 65,433.90  | 99.80%  | 2  | 2  | 2   | 0.01% | 5.63%  |
| Uncategorized Sample | BioSample 1 | (F001791) | Keratin, type II cytoskeletal 1 OS=Homo sapiens GN=KRT1 PE=1 SV=6                                     | K2C1_HUMAN               | SwissProt_2014.08.fasta | 66,040.30  | 100.00% | 5  | 5  | 6   | 0.03% | 8.70%  |
| Uncategorized Sample | BioSample 1 | (F001791) | Synaptotagmin-1 OS=Homo sapiens GN=SYT1 PE=1 SV=1                                                     | SYT1_HUMAN               | SwissProt_2014.08.fasta | 47,574.10  | 100.00% | 2  | 2  | 2   | 0.01% | 5.69%  |
| Uncategorized Sample | BioSample 1 | (F001791) | Protein RUFY3 OS=Homo sapiens GN=RUFY3 PE=1 SV=1                                                      | RUFY3_HUMAN              | SwissProt_2014.08.fasta | 52,967.10  | 99.80%  | 2  | 2  | 2   | 0.01% | 4.69%  |
| Uncategorized Sample | BioSample 1 | (F001791) | Calcium/calmodulin-dependent protein kinase type II subunit alpha OS=Homo sapiens GN=CAMK2A PE=1 SV=2 | KCC2A_HUMAN              | SwissProt_2014.08.fasta | 54,088.70  | 100.00% | 9  | 11 | 87  | 0.48% | 22.40% |
| Uncategorized Sample | BioSample 1 | (F001792) | Alpha-intermexin OS=Homo sapiens GN=INA PE=1 SV=2                                                     | AIXN_HUMAN               | SwissProt_2014.08.fasta | 55,392.30  | 100.00% | 5  | 5  | 7   | 0.04% | 12.80% |
| Uncategorized Sample | BioSample 1 | (F001792) | Calcium/calmodulin-dependent protein kinase type II subunit beta OS=Homo sapiens GN=CAMK2B PE=1 SV=3  | KCC2B_HUMAN              | SwissProt_2014.08.fasta | 72,678.70  | 100.00% | 2  | 2  | 2   | 0.01% | 8.41%  |
| Uncategorized Sample | BioSample 1 | (F001792) | Ubiquitin-60S ribosomal protein L40 OS=Homo sapiens GN=UBA52 PE=1 SV=2                                | RL40_HUMAN,RS27A_HUMAN,U | SwissProt_2014.08.fasta | 17,965.60  | 99.90%  | 2  | 2  | 3   | 0.02% | 22.70% |
| Uncategorized Sample | BioSample 1 | (F001792) | Neural cell adhesion molecule 1 OS=Homo sapiens GN=NCAM1 PE=1 SV=3                                    | NCAM1_HUMAN              | SwissProt_2014.08.fasta | 94,574.30  | 100.00% | 2  | 2  | 2   | 0.01% | 4.43%  |
| Uncategorized Sample | BioSample 1 | (F001792) | Versican core protein OS=Homo sapiens GN=VCAN PE=1 SV=3                                               | CSPG2_HUMAN              | SwissProt_2014.08.fasta | 372,812.60 | 100.00% | 3  | 3  | 5   | 0.03% | 1.21%  |
| Uncategorized Sample | BioSample 1 | (F001792) | Matrin-3 OS=Homo sapiens GN=MATR3 PE=1 SV=2                                                           | MATR3_HUMAN              | SwissProt_2014.08.fasta | 94,626.70  | 100.00% | 4  | 4  | 5   | 0.03% | 8.85%  |
| Uncategorized Sample | BioSample 1 | (F001792) | Heat shock protein HSP 90-alpha OS=Homo sapiens GN=HSP90AA1 PE=1 SV=5                                 | HS90A_HUMAN              | SwissProt_2014.08.fasta | 84,663.20  | 100.00% | 4  | 4  | 7   | 0.04% | 6.83%  |
| Uncategorized Sample | BioSample 1 | (F001792) | Major vault protein OS=Homo sapiens GN=MVP PE=1 SV=4                                                  | MVP_HUMAN                | SwissProt_2014.08.fasta | 99,326.00  | 100.00% | 15 | 16 | 21  | 0.13% | 30.20% |
| Uncategorized Sample | BioSample 1 | (F001792) | Neurofilament light polypeptide OS=Homo sapiens GN=NEFL PE=1 SV=3                                     | NFL_HUMAN                | SwissProt_2014.08.fasta | 61,517.80  | 99.90%  | 2  | 2  | 3   | 0.02% | 6.45%  |
| Uncategorized Sample | BioSample 1 | (F001792) | Peroxisomal multifunctional enzyme type 2 OS=Homo sapiens GN=HSD17B4 PE=1 SV=3                        | DHB4_HUMAN               | SwissProt_2014.08.fasta | 79,688.50  | 100.00% | 3  | 3  | 3   | 0.02% | 7.47%  |
| Uncategorized Sample | BioSample 1 | (F001792) | Neurofilament medium polypeptide OS=Homo sapiens GN=NEFM PE=1 SV=3                                    | NFM_HUMAN                | SwissProt_2014.08.fasta | 102,471.30 | 100.00% | 10 | 10 | 10  | 0.06% | 18.60% |
| Uncategorized Sample | BioSample 1 | (F001792) | Disks large homolog 4 OS=Homo sapiens GN=DLG4 PE=1 SV=3                                               | DLG4_HUMAN               | SwissProt_2014.08.fasta | 80,497.30  | 100.00% | 6  | 6  | 7   | 0.04% | 16.70% |
| Uncategorized Sample | BioSample 1 | (F001792) | Glial fibrillary acidic protein OS=Homo sapiens GN=GFAP PE=1 SV=1                                     | GFAP_HUMAN               | SwissProt_2014.08.fasta | 49,881.40  | 100.00% | 3  | 3  | 3   | 0.02% | 7.18%  |
| Uncategorized Sample | BioSample 1 | (F001792) | Complement C4-A OS=Homo sapiens GN=C4A PE=1 SV=2                                                      | CO4A_HUMAN               | SwissProt_2014.08.fasta | 192,786.80 | 99.80%  | 2  | 2  | 2   | 0.01% | 2.18%  |
| Uncategorized Sample | BioSample 1 | (F001792) | Calcium/calmodulin-dependent protein kinase type II subunit alpha OS=Homo sapiens GN=CAMK2A PE=1 SV=2 | KCC2A_HUMAN              | SwissProt_2014.08.fasta | 54,088.70  | 100.00% | 3  | 3  | 4   | 0.02% | 8.79%  |
| Uncategorized Sample | BioSample 1 | (F001792) | Vesicle-fusing ATPase OS=Homo sapiens GN=NSF PE=1 SV=3                                                | NSF_HUMAN                | SwissProt_2014.08.fasta | 82,597.40  | 100.00% | 2  | 2  | 2   | 0.01% | 3.76%  |
| Uncategorized Sample | BioSample 1 | (F001792) | Heat shock 70 kDa protein 12A OS=Homo sapiens GN=HSPA12A PE=1 SV=2                                    | HS12A_HUMAN              | SwissProt_2014.08.fasta | 74,980.30  | 100.00% | 2  | 2  | 2   | 0.01% | 3.56%  |
| Uncategorized Sample | BioSample 1 | (F001792) | Dynamin-1 OS=Homo sapiens GN=DNM1 PE=1 SV=2                                                           | DYN1_HUMAN               | SwissProt_2014.08.fasta | 97,410.80  | 100.00% | 3  | 3  | 3   | 0.02% | 5.32%  |
| Uncategorized Sample | BioSample 1 | (F001792) | Keratin, type II cytoskeletal 1 OS=Homo sapiens GN=KRT1 PE=1 SV=6                                     | K2C1_HUMAN               | SwissProt_2014.08.fasta | 66,040.30  | 99.80%  | 2  | 2  | 3   | 0.02% | 3.73%  |
| Uncategorized Sample | BioSample 1 | (F001792) | Heterogeneous nuclear ribonucleoprotein U OS=Homo sapiens GN=HNRNPU PE=1 SV=6                         | HNRPU_HUMAN              | SwissProt_2014.08.fasta | 90,585.20  | 100.00% | 4  | 4  | 4   | 0.02% | 9.58%  |
| Uncategorized Sample | BioSample 1 | (F001793) | Cytoplasmic dynein 1 heavy chain 1 OS=Homo sapiens GN=DYNC1H1 PE=1 SV=5                               | DYHC1_HUMAN              | SwissProt_2014.08.fasta | 532,405.60 | 100.00% | 4  | 4  | 4   | 0.03% | 0.93%  |
| Uncategorized Sample | BioSample 1 | (F001793) | TAR DNA-binding protein 43 OS=Homo sapiens GN=TARDBP PE=1 SV=1                                        | TADBP_HUMAN              | SwissProt_2014.08.fasta | 44,739.70  | 99.70%  | 2  | 2  | 3   | 0.02% | 7.25%  |
| Uncategorized Sample | BioSample 1 | (F001793) | Glial fibrillary acidic protein OS=Homo sapiens GN=GFAP PE=1 SV=1                                     | GFAP_HUMAN               | SwissProt_2014.08.fasta | 49,881.40  | 100.00% | 7  | 7  | 9   | 0.06% | 19.20% |
| Uncategorized Sample | BioSample 1 | (F001793) | Microtubule-associated protein 2 OS=Homo sapiens GN=MAP2 PE=1 SV=4                                    | MTAP2_HUMAN              | SwissProt_2014.08.fasta | 199,527.90 | 100.00% | 2  | 2  | 3   | 0.02% | 1.37%  |
| Uncategorized Sample | BioSample 1 | (F001793) | Tubulin beta-4A chain OS=Homo sapiens GN=TUBB4A PE=1 SV=2                                             | TBB4A_HUMAN              | SwissProt_2014.08.fasta | 49,585.50  | 100.00% | 2  | 2  | 3   | 0.02% | 4.95%  |

|                      |             |           |                                                                                                       |                          |                         |            |         |    |    |     |       |        |
|----------------------|-------------|-----------|-------------------------------------------------------------------------------------------------------|--------------------------|-------------------------|------------|---------|----|----|-----|-------|--------|
| Uncategorized Sample | BioSample 1 | (F001793) | Neurofilament heavy polypeptide OS=Homo sapiens GN=NEFH PE=1 SV=4                                     | NFH_HUMAN                | SwissProt_2014.08.fasta | 112,480.10 | 100.00% | 3  | 3  | 5   | 0.03% | 4.09%  |
| Uncategorized Sample | BioSample 1 | (F001793) | Ubiquitin-60S ribosomal protein L40 OS=Homo sapiens GN=UBA52 PE=1 SV=2                                | RL40_HUMAN,RS27A_HUMAN,U | SwissProt_2014.08.fasta | 14,728.90  | 100.00% | 2  | 2  | 22  | 0.14% | 22.70% |
| Uncategorized Sample | BioSample 1 | (F001793) | Neural cell adhesion molecule 1 OS=Homo sapiens GN=NCAM1 PE=1 SV=3                                    | NCAM1_HUMAN              | SwissProt_2014.08.fasta | 94,574.30  | 100.00% | 5  | 5  | 5   | 0.03% | 9.67%  |
| Uncategorized Sample | BioSample 1 | (F001793) | IQ motif and SEC7 domain-containing protein 2 OS=Homo sapiens GN=IQSEC2 PE=1 SV=1                     | IQEC2_HUMAN              | SwissProt_2014.08.fasta | 161,738.20 | 100.00% | 5  | 5  | 6   | 0.04% | 4.80%  |
| Uncategorized Sample | BioSample 1 | (F001793) | Microtubule-associated protein 1B OS=Homo sapiens GN=MAP1B PE=1 SV=2                                  | MAP1B_HUMAN              | SwissProt_2014.08.fasta | 270,634.40 | 100.00% | 2  | 2  | 2   | 0.01% | 1.18%  |
| Uncategorized Sample | BioSample 1 | (F001793) | Contactin-1 OS=Homo sapiens GN=CNTN1 PE=1 SV=1                                                        | CNTN1_HUMAN              | SwissProt_2014.08.fasta | 113,322.80 | 100.00% | 3  | 3  | 3   | 0.02% | 3.24%  |
| Uncategorized Sample | BioSample 1 | (F001793) | Plectin OS=Homo sapiens GN=PLEC PE=1 SV=3                                                             | PLEC_HUMAN               | SwissProt_2014.08.fasta | 531,783.90 | 100.00% | 11 | 11 | 12  | 0.08% | 2.88%  |
| Uncategorized Sample | BioSample 1 | (F001793) | Sodium/potassium-transporting ATPase subunit alpha-1 OS=Homo sapiens GN=ATP1A1 PE=1 SV=1              | AT1A1_HUMAN              | SwissProt_2014.08.fasta | 112,899.50 | 100.00% | 5  | 5  | 5   | 0.03% | 6.35%  |
| Uncategorized Sample | BioSample 1 | (F001793) | Complement C4-A OS=Homo sapiens GN=C4A PE=1 SV=2                                                      | CO4A_HUMAN               | SwissProt_2014.08.fasta | 192,786.80 | 100.00% | 5  | 5  | 7   | 0.05% | 4.99%  |
| Uncategorized Sample | BioSample 1 | (F001793) | SH3 and multiple ankyrin repeat domains protein 3 OS=Homo sapiens GN=SHANK3 PE=1 SV=3                 | SHAN3_HUMAN              | SwissProt_2014.08.fasta | 184,671.50 | 99.80%  | 2  | 2  | 2   | 0.01% | 2.08%  |
| Uncategorized Sample | BioSample 1 | (F001793) | Spectrin beta chain, non-erythrocytic 1 OS=Homo sapiens GN=SPTBN1 PE=1 SV=2                           | SPTB2_HUMAN              | SwissProt_2014.08.fasta | 274,613.40 | 100.00% | 16 | 16 | 16  | 0.10% | 8.88%  |
| Uncategorized Sample | BioSample 1 | (F001793) | Collagen alpha-3(VI) chain OS=Homo sapiens GN=COL6A3 PE=1 SV=5                                        | CO6A3_HUMAN              | SwissProt_2014.08.fasta | 343,667.40 | 100.00% | 3  | 3  | 3   | 0.02% | 1.29%  |
| Uncategorized Sample | BioSample 1 | (F001793) | Collagen alpha-1(VI) chain OS=Homo sapiens GN=COL6A1 PE=1 SV=3                                        | CO6A1_HUMAN              | SwissProt_2014.08.fasta | 108,531.00 | 100.00% | 3  | 3  | 3   | 0.02% | 3.60%  |
| Uncategorized Sample | BioSample 1 | (F001793) | Neurofilament medium polypeptide OS=Homo sapiens GN=NEFM PE=1 SV=3                                    | NFM_HUMAN                | SwissProt_2014.08.fasta | 102,471.30 | 100.00% | 30 | 34 | 117 | 0.76% | 40.50% |
| Uncategorized Sample | BioSample 1 | (F001793) | Tenascin-R OS=Homo sapiens GN=TNR PE=1 SV=3                                                           | TENR_HUMAN               | SwissProt_2014.08.fasta | 149,560.40 | 100.00% | 2  | 2  | 3   | 0.02% | 2.36%  |
| Uncategorized Sample | BioSample 1 | (F001793) | Ferritin light chain OS=Homo sapiens GN=FTL PE=1 SV=2                                                 | FRIL_HUMAN               | SwissProt_2014.08.fasta | 20,020.60  | 100.00% | 6  | 9  | 41  | 0.27% | 32.60% |
| Uncategorized Sample | BioSample 1 | (F001793) | Ferritin heavy chain OS=Homo sapiens GN=FTH1 PE=1 SV=2                                                | FRIH_HUMAN               | SwissProt_2014.08.fasta | 21,226.20  | 100.00% | 12 | 14 | 97  | 0.63% | 46.40% |
| Uncategorized Sample | BioSample 1 | (F001793) | 2',3'-cyclic-nucleotide 3'-phosphodiesterase OS=Homo sapiens GN=CNP PE=1 SV=2                         | CN37_HUMAN               | SwissProt_2014.08.fasta | 47,580.60  | 100.00% | 4  | 4  | 4   | 0.03% | 13.50% |
| Uncategorized Sample | BioSample 1 | (F001793) | Microtubule-associated protein tau OS=Homo sapiens GN=MAPT PE=1 SV=5                                  | TAU_HUMAN                | SwissProt_2014.08.fasta | 78,927.70  | 100.00% | 3  | 3  | 4   | 0.03% | 5.01%  |
| Uncategorized Sample | BioSample 1 | (F001793) | Collagen alpha-2(VI) chain OS=Homo sapiens GN=COL6A2 PE=1 SV=4                                        | CO6A2_HUMAN              | SwissProt_2014.08.fasta | 108,580.80 | 100.00% | 3  | 3  | 3   | 0.02% | 3.34%  |
| Uncategorized Sample | BioSample 1 | (F001793) | Versican core protein OS=Homo sapiens GN=VCAN PE=1 SV=3                                               | CSPG2_HUMAN              | SwissProt_2014.08.fasta | 372,812.60 | 100.00% | 5  | 5  | 6   | 0.04% | 2.18%  |
| Uncategorized Sample | BioSample 1 | (F001793) | Laminin subunit beta-2 OS=Homo sapiens GN=LAMB2 PE=1 SV=2                                             | LAMB2_HUMAN              | SwissProt_2014.08.fasta | 195,975.90 | 100.00% | 4  | 4  | 5   | 0.03% | 2.61%  |
| Uncategorized Sample | BioSample 1 | (F001793) | Actin, cytoplasmic 1 OS=Homo sapiens GN=ACTB PE=1 SV=1                                                | ACTB_HUMAN,ACTG_HUMAN    | SwissProt_2014.08.fasta | 41,737.80  | 100.00% | 2  | 2  | 2   | 0.01% | 7.47%  |
| Uncategorized Sample | BioSample 1 | (F001793) | Prolow-density lipoprotein receptor-related protein 1 OS=Homo sapiens GN=LRP1 PE=1 SV=2               | LRP1_HUMAN               | SwissProt_2014.08.fasta | 504,591.80 | 100.00% | 3  | 3  | 3   | 0.02% | 0.84%  |
| Uncategorized Sample | BioSample 1 | (F001793) | Fibronectin OS=Homo sapiens GN=FN1 PE=1 SV=4                                                          | FN1_HUMAN                | SwissProt_2014.08.fasta | 262,616.90 | 100.00% | 5  | 5  | 6   | 0.04% | 3.10%  |
| Uncategorized Sample | BioSample 1 | (F001793) | Keratin, type II cytoskeletal 1 OS=Homo sapiens GN=KRT1 PE=1 SV=6                                     | K2C1_HUMAN               | SwissProt_2014.08.fasta | 66,040.30  | 100.00% | 3  | 3  | 4   | 0.03% | 5.59%  |
| Uncategorized Sample | BioSample 1 | (F001793) | Neurofilament light polypeptide OS=Homo sapiens GN=NEFL PE=1 SV=3                                     | NFL_HUMAN                | SwissProt_2014.08.fasta | 61,517.80  | 100.00% | 2  | 2  | 2   | 0.01% | 8.47%  |
| Uncategorized Sample | BioSample 1 | (F001793) | Calcium/calmodulin-dependent protein kinase type II subunit alpha OS=Homo sapiens GN=CAMK2A PE=1 SV=2 | KCC2A_HUMAN              | SwissProt_2014.08.fasta | 54,088.70  | 100.00% | 5  | 5  | 6   | 0.04% | 13.40% |
